# Supplementary material for: The N-terminal loop of IRAK-4 death domain regulates ordered assembly of the Myddosome signalling scaffold
Source: PubMed Central journal article supplement (PMC5120336; doi:10.1038/srep37267), 2016-11-23
Supplement: srep37267-s1.pdf [file srep37267-s1.pdf]

## **The N-terminal loop of IRAK-4 death domain regulates ordered assembly of the Myddosome signalling scaffold**

**Anthony C.G. Dossang<sup>\* † 1</sup>, Precious G. Motshwene<sup>\* ‡ 1</sup>, Yang Yang<sup>\*1</sup>, Martyn F. Symmons<sup>\*</sup>, Clare E. Bryant<sup>§</sup>, Satty Borman<sup>†</sup>, Julie George<sup>||</sup>, Alexander N. R. Weber<sup>||</sup> and Nicholas J. Gay<sup>\*2</sup>**

### **SUPPLEMENTARY METHODS - PHOSPHOSITE MAPPING.**

Phosphosite mapping analysis was then carried out on the isolated IRAK-4 death domain. The band corresponding to IRAK-4 DD extracted from the reducing SDS-PAGE gel was digested using Trypsin, Chymotrypsin and AspN endoproteinases. The analysis was carried out using MALDI-TOF MS on an Ultraflex mass spectrometer and by LC-ESI MS on an Agilent HPLC coupled to a Bruker Amazon ion-trap and an Orbitrap mass spectrophotometer where appropriate. One hundred and twenty nine peptides were identified by LC/MS-MS and 44 peptides were identified by MALDI-TOF MS covering 100 % of the IRAK-4 DD (-7) to 107 (Supplementary data tables 1 to 6). The stoichiometry of both species was calculated from the relevant ion intensities of corresponding ion chromatograms. The stoichiometry of the singly phosphorylated form was determined to be equal at 53 % with an error as high as  $\pm 10$  % (as it depends on the relative ionisation efficiency of each form; phosphorylated and non-phosphorylated). In total 16 peptide string masses identified confirmed single phosphorylation of Serine 8 in IRAK-4 DD (Supplementary data tables 1 to 6). Phosphorylation at Serine 8 was further confirmed by the fragmentation of the peptide GAMDPEFMNKPITPSTYVR by MS/MS as shown in supplementary tables 7 and 8.

**Table 1:** a) List 1 of 2 of peptides identified by LC / MS – MS after digestion of IRAK-4 DD using Chymotrypsin. b) List 2 of 2 of peptides identified by LC / MS – MS after digestion of IRAK-4 DD (Section 3.2.4) using Chymotrypsin.

(a)

| Acc. #                                                                                                                                                                                                                                                                                                                                                                                                                                                                                                                                                                                                                                                                                                                                                                                                                                                                                                                                                                                                                                                                                                                                                                                                                            | Protein ID                    | Pep. #                        | % Cov.   | Score       |                                     |                          |
|-----------------------------------------------------------------------------------------------------------------------------------------------------------------------------------------------------------------------------------------------------------------------------------------------------------------------------------------------------------------------------------------------------------------------------------------------------------------------------------------------------------------------------------------------------------------------------------------------------------------------------------------------------------------------------------------------------------------------------------------------------------------------------------------------------------------------------------------------------------------------------------------------------------------------------------------------------------------------------------------------------------------------------------------------------------------------------------------------------------------------------------------------------------------------------------------------------------------------------------|-------------------------------|-------------------------------|----------|-------------|-------------------------------------|--------------------------|
| 9947                                                                                                                                                                                                                                                                                                                                                                                                                                                                                                                                                                                                                                                                                                                                                                                                                                                                                                                                                                                                                                                                                                                                                                                                                              | IRAK4 DEATH DOMAIN            | 57                            | 94%      | <b>1182</b> |                                     |                          |
| <p><b>G</b> <b>A</b> <b>M</b> <b>D</b> <b>P</b> <b>E</b> <b>F</b> <b>M</b> <b>N</b> <b>K</b> <b>P</b> <b>I</b> <b>T</b> <b>P</b> <b>S</b> <b>T</b> <b>Y</b> <b>V</b> <b>R</b> <b>C</b> <b>L</b> <b>N</b> <b>V</b> <b>G</b> <b>L</b> <b>I</b> <b>R</b> <b>K</b> <b>L</b> <b>S</b> <b>D</b> <b>F</b> <b>I</b> <b>D</b> <b>P</b> <b>Q</b> <b>E</b> <b>G</b> <b>W</b> <b>K</b> <b>K</b> <b>L</b> <b>A</b> <b>V</b> <b>A</b> <b>I</b> <b>K</b> <b>K</b> <b>P</b> <b>S</b><br/> <b>G</b> <b>D</b> <b>D</b> <b>R</b> <b>Y</b> <b>N</b> <b>Q</b> <b>F</b> <b>H</b> <b>I</b> <b>R</b> <b>R</b> <b>F</b> <b>E</b> <b>A</b> <b>L</b> <b>L</b> <b>Q</b> <b>T</b> <b>G</b> <b>K</b> <b>S</b> <b>P</b> <b>T</b> <b>S</b> <b>E</b> <b>L</b> <b>L</b> <b>F</b> <b>D</b> <b>W</b> <b>G</b> <b>T</b> <b>T</b> <b>N</b> <b>C</b> <b>T</b> <b>V</b> <b>G</b> <b>D</b> <b>L</b> <b>V</b> <b>D</b> <b>L</b> <b>L</b> <b>I</b> <b>Q</b> <b>N</b> <b>E</b> <b>F</b><br/> <b>F</b> <b>A</b> <b>P</b> <b>A</b> <b>S</b> <b>L</b> <b>L</b> <b>L</b> <b>P</b> <b>D</b> <b>A</b> <b>V</b> <b>P</b> <b>K</b></p> <p><b>Red = MS-MS Underline = PMF</b></p> <p>Comments: Individual ions scores &gt; 23 indicate identity or extensive homology (p&lt;0.05).</p> |                               |                               |          |             |                                     |                          |
| Score                                                                                                                                                                                                                                                                                                                                                                                                                                                                                                                                                                                                                                                                                                                                                                                                                                                                                                                                                                                                                                                                                                                                                                                                                             | Peptide                       | Modifications                 | Obs. m/z | Delta       | MS-MS?                              | PMF?                     |
| 66                                                                                                                                                                                                                                                                                                                                                                                                                                                                                                                                                                                                                                                                                                                                                                                                                                                                                                                                                                                                                                                                                                                                                                                                                                | -.GAMDPEFMNKPITPSTYVRCL.N     | Phospho (Y); 2 Oxidation (M)  | 847.04   | 0.0022      | <input checked="" type="checkbox"/> | <input type="checkbox"/> |
| 40                                                                                                                                                                                                                                                                                                                                                                                                                                                                                                                                                                                                                                                                                                                                                                                                                                                                                                                                                                                                                                                                                                                                                                                                                                | -.GAMDPEFMNKPITPSTY.V         | 2 Oxidation (M)               | 965.93   | 0.0031      | <input checked="" type="checkbox"/> | <input type="checkbox"/> |
| 33                                                                                                                                                                                                                                                                                                                                                                                                                                                                                                                                                                                                                                                                                                                                                                                                                                                                                                                                                                                                                                                                                                                                                                                                                                | -.GAMDPEFMNKPITPSTYVRCLNVGL.I | Phospho (ST); 2 Oxidation (M) | 974.78   | 0.0029      | <input checked="" type="checkbox"/> | <input type="checkbox"/> |
| (23)                                                                                                                                                                                                                                                                                                                                                                                                                                                                                                                                                                                                                                                                                                                                                                                                                                                                                                                                                                                                                                                                                                                                                                                                                              | -.GAMDPEFMNKPITPSTY.V         | Oxidation (M)                 | 957.94   | 0.0031      | <input checked="" type="checkbox"/> | <input type="checkbox"/> |
| (30)                                                                                                                                                                                                                                                                                                                                                                                                                                                                                                                                                                                                                                                                                                                                                                                                                                                                                                                                                                                                                                                                                                                                                                                                                              | -.GAMDPEFMNKPITPSTY.V         | 2 Oxidation (M)               | 965.93   | 0.0000      | <input checked="" type="checkbox"/> | <input type="checkbox"/> |
| (30)                                                                                                                                                                                                                                                                                                                                                                                                                                                                                                                                                                                                                                                                                                                                                                                                                                                                                                                                                                                                                                                                                                                                                                                                                              | -.GAMDPEFMNKPITPSTYVRCL.N     | Phospho (ST); Oxidation (M)   | 1,262.06 | 0.0040      | <input checked="" type="checkbox"/> | <input type="checkbox"/> |
| (32)                                                                                                                                                                                                                                                                                                                                                                                                                                                                                                                                                                                                                                                                                                                                                                                                                                                                                                                                                                                                                                                                                                                                                                                                                              | -.GAMDPEFMNKPITPSTY.V         | Phospho (Y); 2 Oxidation (M)  | 1,005.92 | 0.0006      | <input checked="" type="checkbox"/> | <input type="checkbox"/> |
| (34)                                                                                                                                                                                                                                                                                                                                                                                                                                                                                                                                                                                                                                                                                                                                                                                                                                                                                                                                                                                                                                                                                                                                                                                                                              | -.GAMDPEFMNKPITPSTY.V         | Oxidation (M)                 | 957.93   | -0.0002     | <input checked="" type="checkbox"/> | <input type="checkbox"/> |
| (35)                                                                                                                                                                                                                                                                                                                                                                                                                                                                                                                                                                                                                                                                                                                                                                                                                                                                                                                                                                                                                                                                                                                                                                                                                              | -.GAMDPEFMNKPITPSTY.V         |                               | 949.94   | 0.0001      | <input checked="" type="checkbox"/> | <input type="checkbox"/> |
| (49)                                                                                                                                                                                                                                                                                                                                                                                                                                                                                                                                                                                                                                                                                                                                                                                                                                                                                                                                                                                                                                                                                                                                                                                                                              | -.GAMDPEFMNKPITPSTYVRCL.N     | Phospho (ST); Oxidation (M)   | 841.71   | 0.0019      | <input checked="" type="checkbox"/> | <input type="checkbox"/> |
| (56)                                                                                                                                                                                                                                                                                                                                                                                                                                                                                                                                                                                                                                                                                                                                                                                                                                                                                                                                                                                                                                                                                                                                                                                                                              | -.GAMDPEFMNKPITPSTYVRCL.N     | Phospho (ST)                  | 836.38   | 0.0029      | <input checked="" type="checkbox"/> | <input type="checkbox"/> |
| 56                                                                                                                                                                                                                                                                                                                                                                                                                                                                                                                                                                                                                                                                                                                                                                                                                                                                                                                                                                                                                                                                                                                                                                                                                                | F.MNKPITPSTY.V                | Oxidation (M)                 | 584.29   | 0.0002      | <input checked="" type="checkbox"/> | <input type="checkbox"/> |
| (32)                                                                                                                                                                                                                                                                                                                                                                                                                                                                                                                                                                                                                                                                                                                                                                                                                                                                                                                                                                                                                                                                                                                                                                                                                              | F.MNKPITPSTY.V                | Phospho (ST); Oxidation (M)   | 624.27   | 0.0012      | <input checked="" type="checkbox"/> | <input type="checkbox"/> |
| (50)                                                                                                                                                                                                                                                                                                                                                                                                                                                                                                                                                                                                                                                                                                                                                                                                                                                                                                                                                                                                                                                                                                                                                                                                                              | F.MNKPITPSTY.V                |                               | 576.29   | 0.0030      | <input checked="" type="checkbox"/> | <input type="checkbox"/> |
| 42                                                                                                                                                                                                                                                                                                                                                                                                                                                                                                                                                                                                                                                                                                                                                                                                                                                                                                                                                                                                                                                                                                                                                                                                                                | Y.VRCLNVGL.I                  |                               | 465.76   | -0.0006     | <input checked="" type="checkbox"/> | <input type="checkbox"/> |
| 46                                                                                                                                                                                                                                                                                                                                                                                                                                                                                                                                                                                                                                                                                                                                                                                                                                                                                                                                                                                                                                                                                                                                                                                                                                | L.NVGLIRKLSDFIDPQEGW.K        |                               | 696.37   | 0.0009      | <input checked="" type="checkbox"/> | <input type="checkbox"/> |
| 43                                                                                                                                                                                                                                                                                                                                                                                                                                                                                                                                                                                                                                                                                                                                                                                                                                                                                                                                                                                                                                                                                                                                                                                                                                | L.NVGLIRKLSDF.I               |                               | 631.37   | 0.0004      | <input checked="" type="checkbox"/> | <input type="checkbox"/> |
| 30                                                                                                                                                                                                                                                                                                                                                                                                                                                                                                                                                                                                                                                                                                                                                                                                                                                                                                                                                                                                                                                                                                                                                                                                                                | L.NVGLIRKL.S                  |                               | 456.80   | -0.0005     | <input checked="" type="checkbox"/> | <input type="checkbox"/> |
| (30)                                                                                                                                                                                                                                                                                                                                                                                                                                                                                                                                                                                                                                                                                                                                                                                                                                                                                                                                                                                                                                                                                                                                                                                                                              | L.NVGLIRKLSDFIDPQEGW.K        |                               | 696.37   | 0.0016      | <input checked="" type="checkbox"/> | <input type="checkbox"/> |
| (32)                                                                                                                                                                                                                                                                                                                                                                                                                                                                                                                                                                                                                                                                                                                                                                                                                                                                                                                                                                                                                                                                                                                                                                                                                              | L.NVGLIRKLSDFIDPQEGW.K        |                               | 696.37   | 0.0000      | <input checked="" type="checkbox"/> | <input type="checkbox"/> |
| (34)                                                                                                                                                                                                                                                                                                                                                                                                                                                                                                                                                                                                                                                                                                                                                                                                                                                                                                                                                                                                                                                                                                                                                                                                                              | L.NVGLIRKLSDFIDPQEGW.K        |                               | 696.37   | -0.0011     | <input checked="" type="checkbox"/> | <input type="checkbox"/> |
| 34                                                                                                                                                                                                                                                                                                                                                                                                                                                                                                                                                                                                                                                                                                                                                                                                                                                                                                                                                                                                                                                                                                                                                                                                                                | L.IRKLSDFIDPQEGW.K            |                               | 568.63   | -0.0002     | <input checked="" type="checkbox"/> | <input type="checkbox"/> |
| 28                                                                                                                                                                                                                                                                                                                                                                                                                                                                                                                                                                                                                                                                                                                                                                                                                                                                                                                                                                                                                                                                                                                                                                                                                                | L.IRKLSDFIDPQEGWKKL.A         |                               | 519.04   | -0.0017     | <input checked="" type="checkbox"/> | <input type="checkbox"/> |
| (23)                                                                                                                                                                                                                                                                                                                                                                                                                                                                                                                                                                                                                                                                                                                                                                                                                                                                                                                                                                                                                                                                                                                                                                                                                              | L.IRKLSDFIDPQEGW.K            |                               | 852.44   | -0.0006     | <input checked="" type="checkbox"/> | <input type="checkbox"/> |
| 35                                                                                                                                                                                                                                                                                                                                                                                                                                                                                                                                                                                                                                                                                                                                                                                                                                                                                                                                                                                                                                                                                                                                                                                                                                | L.SDFIDPQEGWKKL.A             |                               | 781.90   | 0.0000      | <input checked="" type="checkbox"/> | <input type="checkbox"/> |
| 31                                                                                                                                                                                                                                                                                                                                                                                                                                                                                                                                                                                                                                                                                                                                                                                                                                                                                                                                                                                                                                                                                                                                                                                                                                | L.SDFIDPQEGW.K                |                               | 597.26   | -0.0010     | <input checked="" type="checkbox"/> | <input type="checkbox"/> |
| (27)                                                                                                                                                                                                                                                                                                                                                                                                                                                                                                                                                                                                                                                                                                                                                                                                                                                                                                                                                                                                                                                                                                                                                                                                                              | L.SDFIDPQEGWKKL.A             |                               | 521.60   | -0.0012     | <input checked="" type="checkbox"/> | <input type="checkbox"/> |
| 33                                                                                                                                                                                                                                                                                                                                                                                                                                                                                                                                                                                                                                                                                                                                                                                                                                                                                                                                                                                                                                                                                                                                                                                                                                | W.KKLAVAIKKPSGDDRY.N          |                               | 448.01   | -0.0005     | <input checked="" type="checkbox"/> | <input type="checkbox"/> |
| (26)                                                                                                                                                                                                                                                                                                                                                                                                                                                                                                                                                                                                                                                                                                                                                                                                                                                                                                                                                                                                                                                                                                                                                                                                                              | W.KKLAVAIKKPSGDDRY.N          |                               | 448.01   | 0.0001      | <input checked="" type="checkbox"/> | <input type="checkbox"/> |
| 67                                                                                                                                                                                                                                                                                                                                                                                                                                                                                                                                                                                                                                                                                                                                                                                                                                                                                                                                                                                                                                                                                                                                                                                                                                | L.AVAIKKPSGDDRY.N             |                               | 710.38   | 0.0005      | <input checked="" type="checkbox"/> | <input type="checkbox"/> |
| 37                                                                                                                                                                                                                                                                                                                                                                                                                                                                                                                                                                                                                                                                                                                                                                                                                                                                                                                                                                                                                                                                                                                                                                                                                                | L.AVAIKKPSGDDRYNQF.H          |                               | 904.97   | 0.0054      | <input checked="" type="checkbox"/> | <input type="checkbox"/> |

(b)

| Acc. #                                                                                                                                                                                                                                                                                                                                                                                                                                                                                                                                                                                                                                                                                                                                                                                                                                                                                                                                                                                                                                                                                                                                                                                                                                   | Protein ID              | Pep. #        | % Cov.   | Score       |                                     |                          |
|------------------------------------------------------------------------------------------------------------------------------------------------------------------------------------------------------------------------------------------------------------------------------------------------------------------------------------------------------------------------------------------------------------------------------------------------------------------------------------------------------------------------------------------------------------------------------------------------------------------------------------------------------------------------------------------------------------------------------------------------------------------------------------------------------------------------------------------------------------------------------------------------------------------------------------------------------------------------------------------------------------------------------------------------------------------------------------------------------------------------------------------------------------------------------------------------------------------------------------------|-------------------------|---------------|----------|-------------|-------------------------------------|--------------------------|
| 9947                                                                                                                                                                                                                                                                                                                                                                                                                                                                                                                                                                                                                                                                                                                                                                                                                                                                                                                                                                                                                                                                                                                                                                                                                                     | IRAK4 DEATH DOMAIN      | 57            | 94%      | <b>1182</b> |                                     |                          |
| <p><b>G</b> <b>A</b> <b>M</b> <b>D</b> <b>P</b> <b>E</b> <b>F</b> <b>M</b> <b>N</b> <b>K</b> <b>P</b> <b>I</b> <b>T</b> <b>P</b> <b>S</b> <b>T</b> <b>Y</b> <b>V</b> <b>R</b> <b>C</b> <b>L</b> <b>N</b> <b>V</b> <b>G</b> <b>L</b> <b>I</b> <b>R</b> <b>K</b> <b>L</b> <b>S</b> <b>D</b> <b>F</b> <b>I</b> <b>D</b> <b>P</b> <b>Q</b> <b>E</b> <b>G</b> <b>W</b> <b>K</b> <b>K</b> <b>L</b> <b>A</b> <b>V</b> <b>A</b> <b>I</b> <b>K</b> <b>K</b> <b>P</b> <b>S</b><br/> <b>G</b> <b>D</b> <b>D</b> <b>R</b> <b>Y</b> <b>N</b> <b>Q</b> <b>F</b> <b>H</b> <b>I</b> <b>R</b> <b>R</b> <b>F</b> <b>E</b> <b>A</b> <b>L</b> <b>L</b> <b>Q</b> <b>T</b> <b>G</b> <b>K</b> <b>S</b> <b>P</b> <b>T</b> <b>S</b> <b>E</b> <b>L</b> <b>L</b> <b>F</b> <b>D</b> <b>W</b> <b>G</b> <b>T</b> <b>T</b> <b>N</b> <b>C</b> <b>T</b> <b>V</b> <b>G</b> <b>D</b> <b>L</b> <b>V</b> <b>D</b> <b>L</b> <b>L</b> <b>I</b> <b>Q</b> <b>N</b> <b>E</b> <b>F</b><br/> <b>F</b> <b>A</b> <b>P</b> <b>A</b> <b>S</b> <b>L</b> <b>L</b> <b>L</b> <b>P</b> <b>D</b> <b>A</b> <b>V</b> <b>P</b> <b>K</b></p> <p><b>Red = MS-MS</b> <b>Underline = PMF</b></p> <p>Comments: Individual ions scores &gt; 23 indicate identity or extensive homology (p&lt;0.05).</p> |                         |               |          |             |                                     |                          |
| Score                                                                                                                                                                                                                                                                                                                                                                                                                                                                                                                                                                                                                                                                                                                                                                                                                                                                                                                                                                                                                                                                                                                                                                                                                                    | Peptide                 | Modifications | Obs. m/z | Delta       | MS-MS?                              | PMF?                     |
| 37                                                                                                                                                                                                                                                                                                                                                                                                                                                                                                                                                                                                                                                                                                                                                                                                                                                                                                                                                                                                                                                                                                                                                                                                                                       | L.AVAIKKPSGDDRYNQF.H    |               | 904.97   | 0.0054      | <input checked="" type="checkbox"/> | <input type="checkbox"/> |
| (24)                                                                                                                                                                                                                                                                                                                                                                                                                                                                                                                                                                                                                                                                                                                                                                                                                                                                                                                                                                                                                                                                                                                                                                                                                                     | L.AVAIKKPSGDDRYNQF.H    |               | 603.65   | 0.0035      | <input checked="" type="checkbox"/> | <input type="checkbox"/> |
| (24)                                                                                                                                                                                                                                                                                                                                                                                                                                                                                                                                                                                                                                                                                                                                                                                                                                                                                                                                                                                                                                                                                                                                                                                                                                     | L.AVAIKKPSGDDRYNQF.H    | Phospho (ST)  | 630.30   | 0.0002      | <input checked="" type="checkbox"/> | <input type="checkbox"/> |
| (31)                                                                                                                                                                                                                                                                                                                                                                                                                                                                                                                                                                                                                                                                                                                                                                                                                                                                                                                                                                                                                                                                                                                                                                                                                                     | L.AVAIKKPSGDDRY.N       |               | 473.92   | -0.0008     | <input checked="" type="checkbox"/> | <input type="checkbox"/> |
| 48                                                                                                                                                                                                                                                                                                                                                                                                                                                                                                                                                                                                                                                                                                                                                                                                                                                                                                                                                                                                                                                                                                                                                                                                                                       | F.EALLQTGKSPTSELL.F     |               | 793.94   | 0.0005      | <input checked="" type="checkbox"/> | <input type="checkbox"/> |
| 43                                                                                                                                                                                                                                                                                                                                                                                                                                                                                                                                                                                                                                                                                                                                                                                                                                                                                                                                                                                                                                                                                                                                                                                                                                       | F.EALLQTGKSPTSEL.L      |               | 737.39   | -0.0007     | <input checked="" type="checkbox"/> | <input type="checkbox"/> |
| (42)                                                                                                                                                                                                                                                                                                                                                                                                                                                                                                                                                                                                                                                                                                                                                                                                                                                                                                                                                                                                                                                                                                                                                                                                                                     | F.EALLQTGKSPTSEL.L      |               | 737.39   | 0.0012      | <input checked="" type="checkbox"/> | <input type="checkbox"/> |
| 47                                                                                                                                                                                                                                                                                                                                                                                                                                                                                                                                                                                                                                                                                                                                                                                                                                                                                                                                                                                                                                                                                                                                                                                                                                       | L.LQTGKSPTSELLF.D       |               | 710.89   | 0.0001      | <input checked="" type="checkbox"/> | <input type="checkbox"/> |
| 24                                                                                                                                                                                                                                                                                                                                                                                                                                                                                                                                                                                                                                                                                                                                                                                                                                                                                                                                                                                                                                                                                                                                                                                                                                       | L.LQTGKSPTSEL.L         |               | 580.81   | 0.0006      | <input checked="" type="checkbox"/> | <input type="checkbox"/> |
| 36                                                                                                                                                                                                                                                                                                                                                                                                                                                                                                                                                                                                                                                                                                                                                                                                                                                                                                                                                                                                                                                                                                                                                                                                                                       | L.QTGKSPTSEL.L          |               | 524.27   | -0.0004     | <input checked="" type="checkbox"/> | <input type="checkbox"/> |
| 34                                                                                                                                                                                                                                                                                                                                                                                                                                                                                                                                                                                                                                                                                                                                                                                                                                                                                                                                                                                                                                                                                                                                                                                                                                       | L.QTGKSPTSELLF.D        |               | 654.35   | 0.0001      | <input checked="" type="checkbox"/> | <input type="checkbox"/> |
| 29                                                                                                                                                                                                                                                                                                                                                                                                                                                                                                                                                                                                                                                                                                                                                                                                                                                                                                                                                                                                                                                                                                                                                                                                                                       | L.QTGKSPTSELL.F         |               | 580.81   | 0.0003      | <input checked="" type="checkbox"/> | <input type="checkbox"/> |
| 30                                                                                                                                                                                                                                                                                                                                                                                                                                                                                                                                                                                                                                                                                                                                                                                                                                                                                                                                                                                                                                                                                                                                                                                                                                       | W.GTTNCTVGDLDVLLIQNEF.F |               | 1,055.01 | 0.0029      | <input checked="" type="checkbox"/> | <input type="checkbox"/> |
| 41                                                                                                                                                                                                                                                                                                                                                                                                                                                                                                                                                                                                                                                                                                                                                                                                                                                                                                                                                                                                                                                                                                                                                                                                                                       | L.LIQNEFFAPAS.L         |               | 675.36   | 0.0002      | <input checked="" type="checkbox"/> | <input type="checkbox"/> |
| 27                                                                                                                                                                                                                                                                                                                                                                                                                                                                                                                                                                                                                                                                                                                                                                                                                                                                                                                                                                                                                                                                                                                                                                                                                                       | L.IQNEFFAPAS.L          |               | 675.36   | 0.0007      | <input checked="" type="checkbox"/> | <input type="checkbox"/> |
| 25                                                                                                                                                                                                                                                                                                                                                                                                                                                                                                                                                                                                                                                                                                                                                                                                                                                                                                                                                                                                                                                                                                                                                                                                                                       | L.IQNEFFAPAS.L          |               | 618.82   | 0.0001      | <input checked="" type="checkbox"/> | <input type="checkbox"/> |
| 71                                                                                                                                                                                                                                                                                                                                                                                                                                                                                                                                                                                                                                                                                                                                                                                                                                                                                                                                                                                                                                                                                                                                                                                                                                       | F.FAPASLLLPDAVPK.-      |               | 719.92   | 0.0007      | <input checked="" type="checkbox"/> | <input type="checkbox"/> |
| (25)                                                                                                                                                                                                                                                                                                                                                                                                                                                                                                                                                                                                                                                                                                                                                                                                                                                                                                                                                                                                                                                                                                                                                                                                                                     | F.FAPASLLLPDAVPK.-      |               | 719.92   | 0.0005      | <input checked="" type="checkbox"/> | <input type="checkbox"/> |
| (27)                                                                                                                                                                                                                                                                                                                                                                                                                                                                                                                                                                                                                                                                                                                                                                                                                                                                                                                                                                                                                                                                                                                                                                                                                                     | F.FAPASLLLPDAVPK.-      |               | 719.92   | 0.0008      | <input checked="" type="checkbox"/> | <input type="checkbox"/> |
| (29)                                                                                                                                                                                                                                                                                                                                                                                                                                                                                                                                                                                                                                                                                                                                                                                                                                                                                                                                                                                                                                                                                                                                                                                                                                     | F.FAPASLLLPDAVPK.-      |               | 719.92   | 0.0001      | <input checked="" type="checkbox"/> | <input type="checkbox"/> |
| (33)                                                                                                                                                                                                                                                                                                                                                                                                                                                                                                                                                                                                                                                                                                                                                                                                                                                                                                                                                                                                                                                                                                                                                                                                                                     | F.FAPASLLLPDAVPK.-      |               | 719.92   | 0.0012      | <input checked="" type="checkbox"/> | <input type="checkbox"/> |
| (38)                                                                                                                                                                                                                                                                                                                                                                                                                                                                                                                                                                                                                                                                                                                                                                                                                                                                                                                                                                                                                                                                                                                                                                                                                                     | F.FAPASLLLPDAVPK.-      |               | 719.92   | 0.0006      | <input checked="" type="checkbox"/> | <input type="checkbox"/> |
| (54)                                                                                                                                                                                                                                                                                                                                                                                                                                                                                                                                                                                                                                                                                                                                                                                                                                                                                                                                                                                                                                                                                                                                                                                                                                     | F.FAPASLLLPDAVPK.-      |               | 719.92   | 0.0011      | <input checked="" type="checkbox"/> | <input type="checkbox"/> |
| (60)                                                                                                                                                                                                                                                                                                                                                                                                                                                                                                                                                                                                                                                                                                                                                                                                                                                                                                                                                                                                                                                                                                                                                                                                                                     | F.FAPASLLLPDAVPK.-      |               | 719.92   | 0.0014      | <input checked="" type="checkbox"/> | <input type="checkbox"/> |
| (66)                                                                                                                                                                                                                                                                                                                                                                                                                                                                                                                                                                                                                                                                                                                                                                                                                                                                                                                                                                                                                                                                                                                                                                                                                                     | F.FAPASLLLPDAVPK.-      |               | 719.92   | -0.0003     | <input checked="" type="checkbox"/> | <input type="checkbox"/> |
| 57                                                                                                                                                                                                                                                                                                                                                                                                                                                                                                                                                                                                                                                                                                                                                                                                                                                                                                                                                                                                                                                                                                                                                                                                                                       | F.APASLLLPDAVPK.-       |               | 646.38   | -0.0003     | <input checked="" type="checkbox"/> | <input type="checkbox"/> |
| 49                                                                                                                                                                                                                                                                                                                                                                                                                                                                                                                                                                                                                                                                                                                                                                                                                                                                                                                                                                                                                                                                                                                                                                                                                                       | L.LPDAVPK.-             |               | 370.22   | 0.0001      | <input checked="" type="checkbox"/> | <input type="checkbox"/> |

**Table 2:** a) List 1 of 2 of peptides identified by LC / MS – MS after digestion of IRAK-4 using Trypsin.  
b) Part 2 of 2 of peptides identified by LC / MS – MS after digestion of IRAK-4 DD using Trypsin.  
(a)

| Acc. #                                                                                                                                                                                                                                                                                                                                                                                                                                                                                                                                                                                                                                                                                                                                                                                                                                                                                                                                                                                                                                                                  | Protein ID              | Pep. #                        | % Cov.   | Score   |        |                          |
|-------------------------------------------------------------------------------------------------------------------------------------------------------------------------------------------------------------------------------------------------------------------------------------------------------------------------------------------------------------------------------------------------------------------------------------------------------------------------------------------------------------------------------------------------------------------------------------------------------------------------------------------------------------------------------------------------------------------------------------------------------------------------------------------------------------------------------------------------------------------------------------------------------------------------------------------------------------------------------------------------------------------------------------------------------------------------|-------------------------|-------------------------------|----------|---------|--------|--------------------------|
| 9947                                                                                                                                                                                                                                                                                                                                                                                                                                                                                                                                                                                                                                                                                                                                                                                                                                                                                                                                                                                                                                                                    | IRAK4 DEATH DOMAIN      | 59                            | 62%      | 645     |        |                          |
| <b>G</b> <b>A</b> <b>M</b> <b>D</b> <b>P</b> <b>E</b> <b>F</b> <b>M</b> <b>N</b> <b>K</b> <b>P</b> <b>I</b> <b>T</b> <b>P</b> <b>S</b> <b>T</b> <b>Y</b> <b>V</b> <b>R</b> <b>C</b> <b>L</b> <b>N</b> <b>V</b> <b>G</b> <b>L</b> <b>I</b> <b>R</b> <b>K</b> <b>L</b> <b>S</b> <b>D</b> <b>F</b> <b>I</b> <b>D</b> <b>P</b> <b>Q</b> <b>E</b> <b>G</b> <b>W</b> <b>K</b> <b>K</b> <b>L</b> <b>A</b> <b>V</b> <b>A</b> <b>I</b> <b>K</b> <b>K</b> <b>P</b> <b>S</b><br><b>G</b> <b>D</b> <b>D</b> <b>R</b> <b>Y</b> <b>N</b> <b>Q</b> <b>F</b> <b>H</b> <b>I</b> <b>R</b> <b>R</b> <b>F</b> <b>E</b> <b>A</b> <b>L</b> <b>L</b> <b>Q</b> <b>T</b> <b>G</b> <b>K</b> <b>S</b> <b>P</b> <b>T</b> <b>S</b> <b>E</b> <b>L</b> <b>L</b> <b>F</b> <b>D</b> <b>W</b> <b>G</b> <b>T</b> <b>T</b> <b>N</b> <b>C</b> <b>T</b> <b>V</b> <b>G</b> <b>D</b> <b>L</b> <b>V</b> <b>D</b> <b>L</b> <b>L</b> <b>I</b> <b>Q</b> <b>N</b> <b>E</b> <b>F</b><br><b>F</b> <b>A</b> <b>P</b> <b>A</b> <b>S</b> <b>L</b> <b>L</b> <b>L</b> <b>P</b> <b>D</b> <b>A</b> <b>V</b> <b>P</b> <b>K</b> |                         |                               |          |         |        |                          |
| <b>Red = MS-MS Underline = PMF</b>                                                                                                                                                                                                                                                                                                                                                                                                                                                                                                                                                                                                                                                                                                                                                                                                                                                                                                                                                                                                                                      |                         |                               |          |         |        |                          |
| Comments: Individual ions scores > 20 indicate identity or extensive homology (p<0.05).                                                                                                                                                                                                                                                                                                                                                                                                                                                                                                                                                                                                                                                                                                                                                                                                                                                                                                                                                                                 |                         |                               |          |         |        |                          |
| Score                                                                                                                                                                                                                                                                                                                                                                                                                                                                                                                                                                                                                                                                                                                                                                                                                                                                                                                                                                                                                                                                   | Peptide                 | Modifications                 | Obs. m/z | Delta   | MS-MS? | PMF?                     |
| 47                                                                                                                                                                                                                                                                                                                                                                                                                                                                                                                                                                                                                                                                                                                                                                                                                                                                                                                                                                                                                                                                      | -.GAMDPEFMNKPITPSTYVR.C | Phospho (ST)                  | 745.34   | -0.0003 | ✗      | <input type="checkbox"/> |
| (20)                                                                                                                                                                                                                                                                                                                                                                                                                                                                                                                                                                                                                                                                                                                                                                                                                                                                                                                                                                                                                                                                    | -.GAMDPEFMNKPITPSTYVR.C | Phospho (ST)                  | 1,117.51 | 0.0008  | ✗      | <input type="checkbox"/> |
| (22)                                                                                                                                                                                                                                                                                                                                                                                                                                                                                                                                                                                                                                                                                                                                                                                                                                                                                                                                                                                                                                                                    | -.GAMDPEFMNKPITPSTYVR.C | Phospho (ST); Oxidation (M)   | 1,125.50 | -0.0007 | ✗      | <input type="checkbox"/> |
| (24)                                                                                                                                                                                                                                                                                                                                                                                                                                                                                                                                                                                                                                                                                                                                                                                                                                                                                                                                                                                                                                                                    | -.GAMDPEFMNKPITPSTYVR.C | Phospho (ST); Oxidation (M)   | 750.67   | -0.0006 | ✗      | <input type="checkbox"/> |
| (26)                                                                                                                                                                                                                                                                                                                                                                                                                                                                                                                                                                                                                                                                                                                                                                                                                                                                                                                                                                                                                                                                    | -.GAMDPEFMNKPITPSTYVR.C | Oxidation (M)                 | 1,085.52 | 0.0037  | ✗      | <input type="checkbox"/> |
| (29)                                                                                                                                                                                                                                                                                                                                                                                                                                                                                                                                                                                                                                                                                                                                                                                                                                                                                                                                                                                                                                                                    | -.GAMDPEFMNKPITPSTYVR.C | 2 Oxidation (M)               | 729.35   | 0.0020  | ✗      | <input type="checkbox"/> |
| (32)                                                                                                                                                                                                                                                                                                                                                                                                                                                                                                                                                                                                                                                                                                                                                                                                                                                                                                                                                                                                                                                                    | -.GAMDPEFMNKPITPSTYVR.C | Oxidation (M)                 | 724.02   | 0.0009  | ✗      | <input type="checkbox"/> |
| (33)                                                                                                                                                                                                                                                                                                                                                                                                                                                                                                                                                                                                                                                                                                                                                                                                                                                                                                                                                                                                                                                                    | -.GAMDPEFMNKPITPSTYVR.C |                               | 718.68   | -0.0009 | ✗      | <input type="checkbox"/> |
| (33)                                                                                                                                                                                                                                                                                                                                                                                                                                                                                                                                                                                                                                                                                                                                                                                                                                                                                                                                                                                                                                                                    | -.GAMDPEFMNKPITPSTYVR.C |                               | 1,077.52 | 0.0014  | ✗      | <input type="checkbox"/> |
| (33)                                                                                                                                                                                                                                                                                                                                                                                                                                                                                                                                                                                                                                                                                                                                                                                                                                                                                                                                                                                                                                                                    | -.GAMDPEFMNKPITPSTYVR.C | 2 Oxidation (M)               | 1,093.52 | 0.0066  | ✗      | <input type="checkbox"/> |
| (41)                                                                                                                                                                                                                                                                                                                                                                                                                                                                                                                                                                                                                                                                                                                                                                                                                                                                                                                                                                                                                                                                    | -.GAMDPEFMNKPITPSTYVR.C | Phospho (ST); 2 Oxidation (M) | 756.00   | -0.0005 | ✗      | <input type="checkbox"/> |
| 59                                                                                                                                                                                                                                                                                                                                                                                                                                                                                                                                                                                                                                                                                                                                                                                                                                                                                                                                                                                                                                                                      | R.CLVGLIR.K             |                               | 472.77   | -0.0006 | ✗      | <input type="checkbox"/> |
| (38)                                                                                                                                                                                                                                                                                                                                                                                                                                                                                                                                                                                                                                                                                                                                                                                                                                                                                                                                                                                                                                                                    | R.CLVGLIR.K             |                               | 472.77   | 0.0001  | ✗      | <input type="checkbox"/> |
| (44)                                                                                                                                                                                                                                                                                                                                                                                                                                                                                                                                                                                                                                                                                                                                                                                                                                                                                                                                                                                                                                                                    | R.CLVGLIR.K             |                               | 472.77   | -0.0005 | ✗      | <input type="checkbox"/> |
| (49)                                                                                                                                                                                                                                                                                                                                                                                                                                                                                                                                                                                                                                                                                                                                                                                                                                                                                                                                                                                                                                                                    | R.CLVGLIR.K             |                               | 472.77   | 0.0010  | ✗      | <input type="checkbox"/> |
| (50)                                                                                                                                                                                                                                                                                                                                                                                                                                                                                                                                                                                                                                                                                                                                                                                                                                                                                                                                                                                                                                                                    | R.CLVGLIR.K             |                               | 472.77   | 0.0042  | ✗      | <input type="checkbox"/> |
| 69                                                                                                                                                                                                                                                                                                                                                                                                                                                                                                                                                                                                                                                                                                                                                                                                                                                                                                                                                                                                                                                                      | R.KLSDFIDPQEGWK.K       |                               | 781.90   | 0.0014  | ✗      | <input type="checkbox"/> |
| 22                                                                                                                                                                                                                                                                                                                                                                                                                                                                                                                                                                                                                                                                                                                                                                                                                                                                                                                                                                                                                                                                      | R.KLSDFIDPQEGWKK.L      |                               | 564.30   | -0.0003 | ✗      | <input type="checkbox"/> |
| (21)                                                                                                                                                                                                                                                                                                                                                                                                                                                                                                                                                                                                                                                                                                                                                                                                                                                                                                                                                                                                                                                                    | R.KLSDFIDPQEGWK.K       |                               | 521.60   | -0.0027 | ✗      | <input type="checkbox"/> |
| (67)                                                                                                                                                                                                                                                                                                                                                                                                                                                                                                                                                                                                                                                                                                                                                                                                                                                                                                                                                                                                                                                                    | R.KLSDFIDPQEGWK.K       |                               | 781.90   | -0.0008 | ✗      | <input type="checkbox"/> |
| 44                                                                                                                                                                                                                                                                                                                                                                                                                                                                                                                                                                                                                                                                                                                                                                                                                                                                                                                                                                                                                                                                      | K.LSDFIDPQEGWK.K        |                               | 717.85   | -0.0012 | ✗      | <input type="checkbox"/> |
| 34                                                                                                                                                                                                                                                                                                                                                                                                                                                                                                                                                                                                                                                                                                                                                                                                                                                                                                                                                                                                                                                                      | K.LSDFIDPQEGWKK.L       |                               | 781.90   | 0.0004  | ✗      | <input type="checkbox"/> |
| (25)                                                                                                                                                                                                                                                                                                                                                                                                                                                                                                                                                                                                                                                                                                                                                                                                                                                                                                                                                                                                                                                                    | K.LSDFIDPQEGWKK.L       |                               | 521.60   | -0.0014 | ✗      | <input type="checkbox"/> |
| (38)                                                                                                                                                                                                                                                                                                                                                                                                                                                                                                                                                                                                                                                                                                                                                                                                                                                                                                                                                                                                                                                                    | K.LSDFIDPQEGWK.K        |                               | 717.85   | 0.0011  | ✗      | <input type="checkbox"/> |
| 50                                                                                                                                                                                                                                                                                                                                                                                                                                                                                                                                                                                                                                                                                                                                                                                                                                                                                                                                                                                                                                                                      | K.LAVAIAIKKPSGDDR.Y     |                               | 457.26   | 0.0002  | ✗      | <input type="checkbox"/> |
| 39                                                                                                                                                                                                                                                                                                                                                                                                                                                                                                                                                                                                                                                                                                                                                                                                                                                                                                                                                                                                                                                                      | K.LAVAIAIK.K            |                               | 307.72   | -0.0006 | ✗      | <input type="checkbox"/> |
| (26)                                                                                                                                                                                                                                                                                                                                                                                                                                                                                                                                                                                                                                                                                                                                                                                                                                                                                                                                                                                                                                                                    | K.LAVAIAIK.K            |                               | 307.72   | 0.0005  | ✗      | <input type="checkbox"/> |
| 40                                                                                                                                                                                                                                                                                                                                                                                                                                                                                                                                                                                                                                                                                                                                                                                                                                                                                                                                                                                                                                                                      | K.KPSGDDR.Y             |                               | 387.69   | 0.0002  | ✗      | <input type="checkbox"/> |
| 30                                                                                                                                                                                                                                                                                                                                                                                                                                                                                                                                                                                                                                                                                                                                                                                                                                                                                                                                                                                                                                                                      | K.KPSGDDRYNQFHIR.R      |                               | 866.93   | 0.0014  | ✗      | <input type="checkbox"/> |
| (20)                                                                                                                                                                                                                                                                                                                                                                                                                                                                                                                                                                                                                                                                                                                                                                                                                                                                                                                                                                                                                                                                    | K.KPSGDDRYNQFHIR.R      |                               | 433.97   | -0.0014 | ✗      | <input type="checkbox"/> |
| (20)                                                                                                                                                                                                                                                                                                                                                                                                                                                                                                                                                                                                                                                                                                                                                                                                                                                                                                                                                                                                                                                                    | K.KPSGDDRYNQFHIR.R      |                               | 578.29   | -0.0011 | ✗      | <input type="checkbox"/> |
| (36)                                                                                                                                                                                                                                                                                                                                                                                                                                                                                                                                                                                                                                                                                                                                                                                                                                                                                                                                                                                                                                                                    | K.KPSGDDR.Y             |                               | 387.69   | -0.0002 | ✗      | <input type="checkbox"/> |
| (36)                                                                                                                                                                                                                                                                                                                                                                                                                                                                                                                                                                                                                                                                                                                                                                                                                                                                                                                                                                                                                                                                    | K.KPSGDDR.Y             |                               | 387.69   | 0.0000  | ✗      | <input type="checkbox"/> |
| (36)                                                                                                                                                                                                                                                                                                                                                                                                                                                                                                                                                                                                                                                                                                                                                                                                                                                                                                                                                                                                                                                                    | K.KPSGDDR.Y             |                               | 387.69   | 0.0002  | ✗      | <input type="checkbox"/> |
| (40)                                                                                                                                                                                                                                                                                                                                                                                                                                                                                                                                                                                                                                                                                                                                                                                                                                                                                                                                                                                                                                                                    | K.KPSGDDR.Y             |                               | 387.69   | 0.0000  | ✗      | <input type="checkbox"/> |

(b)

| Acc. #                                                                                                                                                                                                                                                                                                                                                                                                                                                                                                                                                                                                                                                                                                                                                                                                                                                                                                                                                                                                                                                                                                                                                                                                       | Protein ID         | Pep. #        | % Cov.   | Score   |                                     |                          |
|--------------------------------------------------------------------------------------------------------------------------------------------------------------------------------------------------------------------------------------------------------------------------------------------------------------------------------------------------------------------------------------------------------------------------------------------------------------------------------------------------------------------------------------------------------------------------------------------------------------------------------------------------------------------------------------------------------------------------------------------------------------------------------------------------------------------------------------------------------------------------------------------------------------------------------------------------------------------------------------------------------------------------------------------------------------------------------------------------------------------------------------------------------------------------------------------------------------|--------------------|---------------|----------|---------|-------------------------------------|--------------------------|
| 9947                                                                                                                                                                                                                                                                                                                                                                                                                                                                                                                                                                                                                                                                                                                                                                                                                                                                                                                                                                                                                                                                                                                                                                                                         | IRAK4 DEATH DOMAIN | 59            | 62%      | 645     |                                     |                          |
| <b>G</b> <b>A</b> <b>M</b> <b>D</b> <b>P</b> <b>E</b> <b>F</b> <b>M</b> <b>N</b> <b>K</b> <u><b>P</b></u> <u><b>I</b></u> <u><b>T</b></u> <u><b>P</b></u> <u><b>S</b></u> <u><b>T</b></u> <u><b>Y</b></u> <u><b>V</b></u> <u><b>R</b></u> <b>C</b> <b>L</b> <b>N</b> <b>V</b> <b>G</b> <b>L</b> <b>I</b> <b>R</b> <b>K</b> <b>L</b> <b>S</b> <b>D</b> <b>F</b> <b>I</b> <b>D</b> <b>P</b> <b>Q</b> <b>E</b> <b>G</b> <b>W</b> <b>K</b> <b>K</b> <b>L</b> <b>A</b> <b>V</b> <b>A</b> <b>I</b> <b>K</b> <b>K</b> <b>P</b> <b>S</b><br><b>G</b> <b>D</b> <b>D</b> <b>R</b> <b>Y</b> <b>N</b> <b>Q</b> <b>F</b> <b>H</b> <b>I</b> <u><b>R</b></u> <u><b>R</b></u> <u><b>F</b></u> <u><b>E</b></u> <u><b>A</b></u> <u><b>L</b></u> <u><b>L</b></u> <u><b>Q</b></u> <u><b>T</b></u> <u><b>G</b></u> <b>K</b> <b>S</b> <b>P</b> <b>T</b> <b>S</b> <b>E</b> <b>L</b> <b>L</b> <b>F</b> <b>D</b> <b>W</b> <b>G</b> <b>T</b> <b>T</b> <b>N</b> <b>C</b> <b>T</b> <b>V</b> <b>G</b> <b>D</b> <b>L</b> <b>V</b> <b>D</b> <b>L</b> <b>L</b> <b>I</b> <b>Q</b> <b>N</b> <b>E</b> <b>F</b><br><b>F</b> <b>A</b> <b>P</b> <b>A</b> <b>S</b> <b>L</b> <b>L</b> <b>L</b> <b>P</b> <b>D</b> <b>A</b> <b>V</b> <b>P</b> <b>K</b> |                    |               |          |         |                                     |                          |
| <b>Red = MS-MS</b> <b>Underline = PMF</b>                                                                                                                                                                                                                                                                                                                                                                                                                                                                                                                                                                                                                                                                                                                                                                                                                                                                                                                                                                                                                                                                                                                                                                    |                    |               |          |         |                                     |                          |
| Comments: Individual ions scores > 20 indicate identity or extensive homology (p<0.05).                                                                                                                                                                                                                                                                                                                                                                                                                                                                                                                                                                                                                                                                                                                                                                                                                                                                                                                                                                                                                                                                                                                      |                    |               |          |         |                                     |                          |
| Score                                                                                                                                                                                                                                                                                                                                                                                                                                                                                                                                                                                                                                                                                                                                                                                                                                                                                                                                                                                                                                                                                                                                                                                                        | Peptide            | Modifications | Obs. m/z | Delta   | MS-MS?                              | PMF?                     |
| (36)                                                                                                                                                                                                                                                                                                                                                                                                                                                                                                                                                                                                                                                                                                                                                                                                                                                                                                                                                                                                                                                                                                                                                                                                         | K.KPSGDDR.Y        |               | 387.69   | 0.0002  | <input checked="" type="checkbox"/> | <input type="checkbox"/> |
| (40)                                                                                                                                                                                                                                                                                                                                                                                                                                                                                                                                                                                                                                                                                                                                                                                                                                                                                                                                                                                                                                                                                                                                                                                                         | K.KPSGDDR.Y        |               | 387.69   | 0.0000  | <input checked="" type="checkbox"/> | <input type="checkbox"/> |
| (40)                                                                                                                                                                                                                                                                                                                                                                                                                                                                                                                                                                                                                                                                                                                                                                                                                                                                                                                                                                                                                                                                                                                                                                                                         | K.KPSGDDR.Y        |               | 387.69   | 0.0001  | <input checked="" type="checkbox"/> | <input type="checkbox"/> |
| (40)                                                                                                                                                                                                                                                                                                                                                                                                                                                                                                                                                                                                                                                                                                                                                                                                                                                                                                                                                                                                                                                                                                                                                                                                         | K.KPSGDDR.Y        |               | 387.69   | 0.0001  | <input checked="" type="checkbox"/> | <input type="checkbox"/> |
| (40)                                                                                                                                                                                                                                                                                                                                                                                                                                                                                                                                                                                                                                                                                                                                                                                                                                                                                                                                                                                                                                                                                                                                                                                                         | K.KPSGDDR.Y        |               | 387.69   | 0.0001  | <input checked="" type="checkbox"/> | <input type="checkbox"/> |
| 45                                                                                                                                                                                                                                                                                                                                                                                                                                                                                                                                                                                                                                                                                                                                                                                                                                                                                                                                                                                                                                                                                                                                                                                                           | R.YNQFHIR.R        |               | 489.25   | -0.0003 | <input checked="" type="checkbox"/> | <input type="checkbox"/> |
| (20)                                                                                                                                                                                                                                                                                                                                                                                                                                                                                                                                                                                                                                                                                                                                                                                                                                                                                                                                                                                                                                                                                                                                                                                                         | R.YNQFHIR.R        |               | 326.50   | -0.0004 | <input checked="" type="checkbox"/> | <input type="checkbox"/> |
| (23)                                                                                                                                                                                                                                                                                                                                                                                                                                                                                                                                                                                                                                                                                                                                                                                                                                                                                                                                                                                                                                                                                                                                                                                                         | R.YNQFHIR.R        |               | 489.25   | -0.0003 | <input checked="" type="checkbox"/> | <input type="checkbox"/> |
| (28)                                                                                                                                                                                                                                                                                                                                                                                                                                                                                                                                                                                                                                                                                                                                                                                                                                                                                                                                                                                                                                                                                                                                                                                                         | R.YNQFHIR.R        |               | 489.25   | -0.0012 | <input checked="" type="checkbox"/> | <input type="checkbox"/> |
| (28)                                                                                                                                                                                                                                                                                                                                                                                                                                                                                                                                                                                                                                                                                                                                                                                                                                                                                                                                                                                                                                                                                                                                                                                                         | R.YNQFHIR.R        |               | 489.25   | -0.0009 | <input checked="" type="checkbox"/> | <input type="checkbox"/> |
| (28)                                                                                                                                                                                                                                                                                                                                                                                                                                                                                                                                                                                                                                                                                                                                                                                                                                                                                                                                                                                                                                                                                                                                                                                                         | R.YNQFHIR.R        |               | 489.25   | -0.0002 | <input checked="" type="checkbox"/> | <input type="checkbox"/> |
| (30)                                                                                                                                                                                                                                                                                                                                                                                                                                                                                                                                                                                                                                                                                                                                                                                                                                                                                                                                                                                                                                                                                                                                                                                                         | R.YNQFHIR.R        |               | 489.25   | 0.0000  | <input checked="" type="checkbox"/> | <input type="checkbox"/> |
| (44)                                                                                                                                                                                                                                                                                                                                                                                                                                                                                                                                                                                                                                                                                                                                                                                                                                                                                                                                                                                                                                                                                                                                                                                                         | R.YNQFHIR.R        |               | 489.25   | -0.0011 | <input checked="" type="checkbox"/> | <input type="checkbox"/> |
| 54                                                                                                                                                                                                                                                                                                                                                                                                                                                                                                                                                                                                                                                                                                                                                                                                                                                                                                                                                                                                                                                                                                                                                                                                           | R.RFEALLQTGK.S     |               | 581.83   | -0.0012 | <input checked="" type="checkbox"/> | <input type="checkbox"/> |
| (20)                                                                                                                                                                                                                                                                                                                                                                                                                                                                                                                                                                                                                                                                                                                                                                                                                                                                                                                                                                                                                                                                                                                                                                                                         | R.RFEALLQTGK.S     |               | 581.83   | -0.0001 | <input checked="" type="checkbox"/> | <input type="checkbox"/> |
| (32)                                                                                                                                                                                                                                                                                                                                                                                                                                                                                                                                                                                                                                                                                                                                                                                                                                                                                                                                                                                                                                                                                                                                                                                                         | R.RFEALLQTGK.S     |               | 388.22   | 0.0006  | <input checked="" type="checkbox"/> | <input type="checkbox"/> |
| (37)                                                                                                                                                                                                                                                                                                                                                                                                                                                                                                                                                                                                                                                                                                                                                                                                                                                                                                                                                                                                                                                                                                                                                                                                         | R.RFEALLQTGK.S     |               | 581.83   | -0.0002 | <input checked="" type="checkbox"/> | <input type="checkbox"/> |
| (42)                                                                                                                                                                                                                                                                                                                                                                                                                                                                                                                                                                                                                                                                                                                                                                                                                                                                                                                                                                                                                                                                                                                                                                                                         | R.RFEALLQTGK.S     |               | 581.83   | 0.0001  | <input checked="" type="checkbox"/> | <input type="checkbox"/> |
| (44)                                                                                                                                                                                                                                                                                                                                                                                                                                                                                                                                                                                                                                                                                                                                                                                                                                                                                                                                                                                                                                                                                                                                                                                                         | R.RFEALLQTGK.S     |               | 581.83   | 0.0000  | <input checked="" type="checkbox"/> | <input type="checkbox"/> |
| (46)                                                                                                                                                                                                                                                                                                                                                                                                                                                                                                                                                                                                                                                                                                                                                                                                                                                                                                                                                                                                                                                                                                                                                                                                         | R.RFEALLQTGK.S     |               | 581.83   | -0.0006 | <input checked="" type="checkbox"/> | <input type="checkbox"/> |
| (46)                                                                                                                                                                                                                                                                                                                                                                                                                                                                                                                                                                                                                                                                                                                                                                                                                                                                                                                                                                                                                                                                                                                                                                                                         | R.RFEALLQTGK.S     |               | 581.83   | -0.0002 | <input checked="" type="checkbox"/> | <input type="checkbox"/> |
| (54)                                                                                                                                                                                                                                                                                                                                                                                                                                                                                                                                                                                                                                                                                                                                                                                                                                                                                                                                                                                                                                                                                                                                                                                                         | R.RFEALLQTGK.S     |               | 581.83   | 0.0006  | <input checked="" type="checkbox"/> | <input type="checkbox"/> |
| 55                                                                                                                                                                                                                                                                                                                                                                                                                                                                                                                                                                                                                                                                                                                                                                                                                                                                                                                                                                                                                                                                                                                                                                                                           | R.FEALLQTGK.S      |               | 503.78   | -0.0009 | <input checked="" type="checkbox"/> | <input type="checkbox"/> |
| 44                                                                                                                                                                                                                                                                                                                                                                                                                                                                                                                                                                                                                                                                                                                                                                                                                                                                                                                                                                                                                                                                                                                                                                                                           | K.TANTLPSK.E       |               | 416.23   | 0.0002  | <input checked="" type="checkbox"/> | <input type="checkbox"/> |
| 27                                                                                                                                                                                                                                                                                                                                                                                                                                                                                                                                                                                                                                                                                                                                                                                                                                                                                                                                                                                                                                                                                                                                                                                                           | K.EAIVQQK.Q        |               | 458.76   | 0.0000  | <input checked="" type="checkbox"/> | <input type="checkbox"/> |
| 47                                                                                                                                                                                                                                                                                                                                                                                                                                                                                                                                                                                                                                                                                                                                                                                                                                                                                                                                                                                                                                                                                                                                                                                                           | K.SLEVSDFR.F       |               | 453.73   | 0.0001  | <input checked="" type="checkbox"/> | <input type="checkbox"/> |

(c)

| Score                                                                                                                                                                                                                                                                                                                                                                                                                                                                                                                                                                                                                                                                                                                                                                                                                                                                                                                                                                                                                                                                   | Peptide            | Modifications | Obs. m/z | Delta   | MS-MS?                              | PMF?                     |
|-------------------------------------------------------------------------------------------------------------------------------------------------------------------------------------------------------------------------------------------------------------------------------------------------------------------------------------------------------------------------------------------------------------------------------------------------------------------------------------------------------------------------------------------------------------------------------------------------------------------------------------------------------------------------------------------------------------------------------------------------------------------------------------------------------------------------------------------------------------------------------------------------------------------------------------------------------------------------------------------------------------------------------------------------------------------------|--------------------|---------------|----------|---------|-------------------------------------|--------------------------|
| 9947                                                                                                                                                                                                                                                                                                                                                                                                                                                                                                                                                                                                                                                                                                                                                                                                                                                                                                                                                                                                                                                                    | IRAK4 DEATH DOMAIN |               | 88       | 62%     | 645                                 |                          |
| <b>G</b> <b>A</b> <b>M</b> <b>D</b> <b>P</b> <b>E</b> <b>F</b> <b>M</b> <b>N</b> <b>K</b> <b>P</b> <b>I</b> <b>T</b> <b>P</b> <b>S</b> <b>T</b> <b>Y</b> <b>V</b> <b>R</b> <b>C</b> <b>L</b> <b>N</b> <b>V</b> <b>G</b> <b>L</b> <b>I</b> <b>R</b> <b>K</b> <b>L</b> <b>S</b> <b>D</b> <b>F</b> <b>I</b> <b>D</b> <b>P</b> <b>Q</b> <b>E</b> <b>G</b> <b>W</b> <b>K</b> <b>K</b> <b>L</b> <b>A</b> <b>V</b> <b>A</b> <b>I</b> <b>K</b> <b>K</b> <b>P</b> <b>S</b><br><b>G</b> <b>D</b> <b>D</b> <b>R</b> <b>Y</b> <b>N</b> <b>Q</b> <b>F</b> <b>H</b> <b>I</b> <b>R</b> <b>R</b> <b>F</b> <b>E</b> <b>A</b> <b>L</b> <b>L</b> <b>Q</b> <b>T</b> <b>G</b> <b>K</b> <b>S</b> <b>P</b> <b>T</b> <b>S</b> <b>E</b> <b>L</b> <b>L</b> <b>F</b> <b>D</b> <b>W</b> <b>G</b> <b>T</b> <b>T</b> <b>N</b> <b>C</b> <b>T</b> <b>V</b> <b>G</b> <b>D</b> <b>L</b> <b>V</b> <b>D</b> <b>L</b> <b>L</b> <b>I</b> <b>Q</b> <b>N</b> <b>E</b> <b>F</b><br><b>F</b> <b>A</b> <b>P</b> <b>A</b> <b>S</b> <b>L</b> <b>L</b> <b>L</b> <b>P</b> <b>D</b> <b>A</b> <b>V</b> <b>P</b> <b>K</b> |                    |               |          |         |                                     |                          |
| <b>Red = MS-MS Underline = PMF</b>                                                                                                                                                                                                                                                                                                                                                                                                                                                                                                                                                                                                                                                                                                                                                                                                                                                                                                                                                                                                                                      |                    |               |          |         |                                     |                          |
| Comments: Individual ions scores > 20 indicate identity or extensive homology (p<0.05).                                                                                                                                                                                                                                                                                                                                                                                                                                                                                                                                                                                                                                                                                                                                                                                                                                                                                                                                                                                 |                    |               |          |         |                                     |                          |
| 47                                                                                                                                                                                                                                                                                                                                                                                                                                                                                                                                                                                                                                                                                                                                                                                                                                                                                                                                                                                                                                                                      | K.LAVAIK.K         |               | 307.72   | -0.0001 | <input checked="" type="checkbox"/> | <input type="checkbox"/> |
| (29)                                                                                                                                                                                                                                                                                                                                                                                                                                                                                                                                                                                                                                                                                                                                                                                                                                                                                                                                                                                                                                                                    | K.LAVAIK.K         |               | 307.72   | -0.0002 | <input checked="" type="checkbox"/> | <input type="checkbox"/> |
| (33)                                                                                                                                                                                                                                                                                                                                                                                                                                                                                                                                                                                                                                                                                                                                                                                                                                                                                                                                                                                                                                                                    | K.LAVAIK.K         |               | 307.72   | 0.0000  | <input checked="" type="checkbox"/> | <input type="checkbox"/> |
| (43)                                                                                                                                                                                                                                                                                                                                                                                                                                                                                                                                                                                                                                                                                                                                                                                                                                                                                                                                                                                                                                                                    | K.LAVAIK.K         |               | 307.72   | 0.0005  | <input checked="" type="checkbox"/> | <input type="checkbox"/> |
| (45)                                                                                                                                                                                                                                                                                                                                                                                                                                                                                                                                                                                                                                                                                                                                                                                                                                                                                                                                                                                                                                                                    | K.LAVAIK.K         |               | 307.72   | 0.0005  | <input checked="" type="checkbox"/> | <input type="checkbox"/> |
| 40                                                                                                                                                                                                                                                                                                                                                                                                                                                                                                                                                                                                                                                                                                                                                                                                                                                                                                                                                                                                                                                                      | K.KPSGDDR.Y        |               | 387.69   | 0.0000  | <input checked="" type="checkbox"/> | <input type="checkbox"/> |
| 34                                                                                                                                                                                                                                                                                                                                                                                                                                                                                                                                                                                                                                                                                                                                                                                                                                                                                                                                                                                                                                                                      | K.KPSGDDRYNQFHIR.R |               | 866.93   | 0.0030  | <input checked="" type="checkbox"/> | <input type="checkbox"/> |
| (25)                                                                                                                                                                                                                                                                                                                                                                                                                                                                                                                                                                                                                                                                                                                                                                                                                                                                                                                                                                                                                                                                    | K.KPSGDDRYNQFHIR.R |               | 578.29   | 0.0014  | <input checked="" type="checkbox"/> | <input type="checkbox"/> |
| (37)                                                                                                                                                                                                                                                                                                                                                                                                                                                                                                                                                                                                                                                                                                                                                                                                                                                                                                                                                                                                                                                                    | K.KPSGDDR.Y        |               | 387.69   | 0.0002  | <input checked="" type="checkbox"/> | <input type="checkbox"/> |
| (39)                                                                                                                                                                                                                                                                                                                                                                                                                                                                                                                                                                                                                                                                                                                                                                                                                                                                                                                                                                                                                                                                    | K.KPSGDDR.Y        |               | 387.69   | 0.0002  | <input checked="" type="checkbox"/> | <input type="checkbox"/> |
| (40)                                                                                                                                                                                                                                                                                                                                                                                                                                                                                                                                                                                                                                                                                                                                                                                                                                                                                                                                                                                                                                                                    | K.KPSGDDR.Y        |               | 387.69   | 0.0001  | <input checked="" type="checkbox"/> | <input type="checkbox"/> |
| (40)                                                                                                                                                                                                                                                                                                                                                                                                                                                                                                                                                                                                                                                                                                                                                                                                                                                                                                                                                                                                                                                                    | K.KPSGDDR.Y        |               | 387.69   | 0.0001  | <input checked="" type="checkbox"/> | <input type="checkbox"/> |
| (40)                                                                                                                                                                                                                                                                                                                                                                                                                                                                                                                                                                                                                                                                                                                                                                                                                                                                                                                                                                                                                                                                    | K.KPSGDDR.Y        |               | 387.69   | 0.0002  | <input checked="" type="checkbox"/> | <input type="checkbox"/> |
| 50                                                                                                                                                                                                                                                                                                                                                                                                                                                                                                                                                                                                                                                                                                                                                                                                                                                                                                                                                                                                                                                                      | R.YNQFHIR.R        |               | 489.25   | -0.0001 | <input checked="" type="checkbox"/> | <input type="checkbox"/> |
| (25)                                                                                                                                                                                                                                                                                                                                                                                                                                                                                                                                                                                                                                                                                                                                                                                                                                                                                                                                                                                                                                                                    | R.YNQFHIR.R        |               | 489.25   | -0.0007 | <input checked="" type="checkbox"/> | <input type="checkbox"/> |
| (29)                                                                                                                                                                                                                                                                                                                                                                                                                                                                                                                                                                                                                                                                                                                                                                                                                                                                                                                                                                                                                                                                    | R.YNQFHIR.R        |               | 489.25   | 0.0005  | <input checked="" type="checkbox"/> | <input type="checkbox"/> |
| (31)                                                                                                                                                                                                                                                                                                                                                                                                                                                                                                                                                                                                                                                                                                                                                                                                                                                                                                                                                                                                                                                                    | R.YNQFHIR.R        |               | 489.25   | -0.0003 | <input checked="" type="checkbox"/> | <input type="checkbox"/> |
| (34)                                                                                                                                                                                                                                                                                                                                                                                                                                                                                                                                                                                                                                                                                                                                                                                                                                                                                                                                                                                                                                                                    | R.YNQFHIR.R        |               | 489.25   | -0.0003 | <input checked="" type="checkbox"/> | <input type="checkbox"/> |
| (36)                                                                                                                                                                                                                                                                                                                                                                                                                                                                                                                                                                                                                                                                                                                                                                                                                                                                                                                                                                                                                                                                    | R.YNQFHIR.R        |               | 489.25   | 0.0010  | <input checked="" type="checkbox"/> | <input type="checkbox"/> |
| (38)                                                                                                                                                                                                                                                                                                                                                                                                                                                                                                                                                                                                                                                                                                                                                                                                                                                                                                                                                                                                                                                                    | R.YNQFHIR.R        |               | 489.25   | 0.0001  | <input checked="" type="checkbox"/> | <input type="checkbox"/> |
| (38)                                                                                                                                                                                                                                                                                                                                                                                                                                                                                                                                                                                                                                                                                                                                                                                                                                                                                                                                                                                                                                                                    | R.YNQFHIR.R        |               | 489.25   | 0.0005  | <input checked="" type="checkbox"/> | <input type="checkbox"/> |
| (41)                                                                                                                                                                                                                                                                                                                                                                                                                                                                                                                                                                                                                                                                                                                                                                                                                                                                                                                                                                                                                                                                    | R.YNQFHIR.R        |               | 489.25   | -0.0007 | <input checked="" type="checkbox"/> | <input type="checkbox"/> |
| (41)                                                                                                                                                                                                                                                                                                                                                                                                                                                                                                                                                                                                                                                                                                                                                                                                                                                                                                                                                                                                                                                                    | R.YNQFHIR.R        |               | 489.25   | -0.0002 | <input checked="" type="checkbox"/> | <input type="checkbox"/> |
| (41)                                                                                                                                                                                                                                                                                                                                                                                                                                                                                                                                                                                                                                                                                                                                                                                                                                                                                                                                                                                                                                                                    | R.YNQFHIR.R        |               | 489.25   | -0.0002 | <input checked="" type="checkbox"/> | <input type="checkbox"/> |
| (45)                                                                                                                                                                                                                                                                                                                                                                                                                                                                                                                                                                                                                                                                                                                                                                                                                                                                                                                                                                                                                                                                    | R.YNQFHIR.R        |               | 489.25   | -0.0005 | <input checked="" type="checkbox"/> | <input type="checkbox"/> |





**Table 3:** Peptides identified by MALDI-TOF MS after digestion of IRAK-4 DD using Trypsin.

| 9947                                                                                                                                                                                                                                                                                                                                                                                                                                                                                                                                                                                                                                                                                                                                                                                                                                                                                                                                                                                                                                                                                                                                                                                                                                                                                                                                                                                                                                                                                                                                                                                                                                                                                                                                                                                                     | IRAK4 DEATH DOMAIN        | 19                            | 62%      | 427     |                                     |                                     |
|----------------------------------------------------------------------------------------------------------------------------------------------------------------------------------------------------------------------------------------------------------------------------------------------------------------------------------------------------------------------------------------------------------------------------------------------------------------------------------------------------------------------------------------------------------------------------------------------------------------------------------------------------------------------------------------------------------------------------------------------------------------------------------------------------------------------------------------------------------------------------------------------------------------------------------------------------------------------------------------------------------------------------------------------------------------------------------------------------------------------------------------------------------------------------------------------------------------------------------------------------------------------------------------------------------------------------------------------------------------------------------------------------------------------------------------------------------------------------------------------------------------------------------------------------------------------------------------------------------------------------------------------------------------------------------------------------------------------------------------------------------------------------------------------------------|---------------------------|-------------------------------|----------|---------|-------------------------------------|-------------------------------------|
| <p><b>G</b> <b>A</b> <b>M</b> <b>D</b> <b>P</b> <b>E</b> <b>F</b> <b>M</b> <b>N</b> <b>K</b> <u><b>P</b></u> <u><b>I</b></u> <u><b>T</b></u> <u><b>P</b></u> <u><b>S</b></u> <u><b>T</b></u> <u><b>Y</b></u> <u><b>V</b></u> <u><b>R</b></u> <u><b>C</b></u> <u><b>L</b></u> <u><b>N</b></u> <u><b>V</b></u> <u><b>G</b></u> <u><b>L</b></u> <u><b>I</b></u> <u><b>R</b></u> <u><b>K</b></u> <u><b>L</b></u> <u><b>S</b></u> <u><b>D</b></u> <u><b>F</b></u> <u><b>I</b></u> <u><b>D</b></u> <u><b>P</b></u> <u><b>Q</b></u> <u><b>E</b></u> <u><b>G</b></u> <u><b>W</b></u> <u><b>K</b></u> <u><b>K</b></u> <u><b>L</b></u> <u><b>A</b></u> <u><b>V</b></u> <u><b>A</b></u> <u><b>I</b></u> <u><b>K</b></u> <u><b>K</b></u> <u><b>P</b></u> <u><b>S</b></u><br/> <b>G</b> <b>D</b> <b>D</b> <b>R</b> <b>Y</b> <b>N</b> <b>Q</b> <b>E</b> <b>H</b> <b>I</b> <u><b>R</b></u> <u><b>R</b></u> <u><b>F</b></u> <u><b>E</b></u> <u><b>A</b></u> <u><b>L</b></u> <u><b>L</b></u> <u><b>Q</b></u> <u><b>T</b></u> <u><b>G</b></u> <u><b>K</b></u> <u><b>S</b></u> <u><b>P</b></u> <u><b>T</b></u> <u><b>S</b></u> <u><b>E</b></u> <u><b>L</b></u> <u><b>L</b></u> <u><b>F</b></u> <u><b>D</b></u> <u><b>W</b></u> <u><b>G</b></u> <u><b>T</b></u> <u><b>T</b></u> <u><b>N</b></u> <u><b>C</b></u> <u><b>T</b></u> <u><b>V</b></u> <u><b>G</b></u> <u><b>L</b></u> <u><b>V</b></u> <u><b>D</b></u> <u><b>L</b></u> <u><b>L</b></u> <u><b>I</b></u> <u><b>Q</b></u> <u><b>N</b></u> <u><b>E</b></u> <u><b>F</b></u><br/> <b>F</b> <b>A</b> <b>P</b> <b>A</b> <b>S</b> <b>L</b> <b>L</b> <b>L</b> <b>P</b> <b>D</b> <b>A</b> <b>V</b> <b>P</b> <b>K</b></p> <p><b>Red = MS-MS</b> <b>Underline = PMF</b></p> <p>Comments: Individual ions scores &gt; 28 indicate identity or extensive homology (p&lt;0.05).</p> |                           |                               |          |         |                                     |                                     |
| Score                                                                                                                                                                                                                                                                                                                                                                                                                                                                                                                                                                                                                                                                                                                                                                                                                                                                                                                                                                                                                                                                                                                                                                                                                                                                                                                                                                                                                                                                                                                                                                                                                                                                                                                                                                                                    | Peptide                   | Modifications                 | Obs. m/z | Delta   | MS-MS?                              | PMF?                                |
| 77                                                                                                                                                                                                                                                                                                                                                                                                                                                                                                                                                                                                                                                                                                                                                                                                                                                                                                                                                                                                                                                                                                                                                                                                                                                                                                                                                                                                                                                                                                                                                                                                                                                                                                                                                                                                       | -.GAMDPEFMNKPITPSTYVR.C   |                               | 2,154.14 | 0.1071  | <input checked="" type="checkbox"/> | <input type="checkbox"/>            |
| 0                                                                                                                                                                                                                                                                                                                                                                                                                                                                                                                                                                                                                                                                                                                                                                                                                                                                                                                                                                                                                                                                                                                                                                                                                                                                                                                                                                                                                                                                                                                                                                                                                                                                                                                                                                                                        | -.GAMDPEFMNKPITPSTYVR.C   | Oxidation (M)                 | 2,170.15 | 0.1183  | <input type="checkbox"/>            | <input checked="" type="checkbox"/> |
| 0                                                                                                                                                                                                                                                                                                                                                                                                                                                                                                                                                                                                                                                                                                                                                                                                                                                                                                                                                                                                                                                                                                                                                                                                                                                                                                                                                                                                                                                                                                                                                                                                                                                                                                                                                                                                        | -.GAMDPEFMNKPITPSTYVR.C   | 2 Oxidation (M)               | 2,186.16 | 0.1288  | <input type="checkbox"/>            | <input checked="" type="checkbox"/> |
| (48)                                                                                                                                                                                                                                                                                                                                                                                                                                                                                                                                                                                                                                                                                                                                                                                                                                                                                                                                                                                                                                                                                                                                                                                                                                                                                                                                                                                                                                                                                                                                                                                                                                                                                                                                                                                                     | -.GAMDPEFMNKPITPSTYVR.C   | Phospho (ST)                  | 2,234.13 | 0.1295  | <input checked="" type="checkbox"/> | <input type="checkbox"/>            |
| (57)                                                                                                                                                                                                                                                                                                                                                                                                                                                                                                                                                                                                                                                                                                                                                                                                                                                                                                                                                                                                                                                                                                                                                                                                                                                                                                                                                                                                                                                                                                                                                                                                                                                                                                                                                                                                     | -.GAMDPEFMNKPITPSTYVR.C   | Oxidation (M); Phospho (ST)   | 2,250.12 | 0.1276  | <input checked="" type="checkbox"/> | <input type="checkbox"/>            |
| (74)                                                                                                                                                                                                                                                                                                                                                                                                                                                                                                                                                                                                                                                                                                                                                                                                                                                                                                                                                                                                                                                                                                                                                                                                                                                                                                                                                                                                                                                                                                                                                                                                                                                                                                                                                                                                     | -.GAMDPEFMNKPITPSTYVR.C   | 2 Oxidation (M); Phospho (ST) | 2,266.13 | 0.1421  | <input checked="" type="checkbox"/> | <input type="checkbox"/>            |
| 0                                                                                                                                                                                                                                                                                                                                                                                                                                                                                                                                                                                                                                                                                                                                                                                                                                                                                                                                                                                                                                                                                                                                                                                                                                                                                                                                                                                                                                                                                                                                                                                                                                                                                                                                                                                                        | R.CLVGLIR.K               |                               | 944.58   | 0.0449  | <input type="checkbox"/>            | <input checked="" type="checkbox"/> |
| 92                                                                                                                                                                                                                                                                                                                                                                                                                                                                                                                                                                                                                                                                                                                                                                                                                                                                                                                                                                                                                                                                                                                                                                                                                                                                                                                                                                                                                                                                                                                                                                                                                                                                                                                                                                                                       | R.KLSDFIDPQEGWKK.L        |                               | 1,690.96 | 0.0765  | <input checked="" type="checkbox"/> | <input type="checkbox"/>            |
| 73                                                                                                                                                                                                                                                                                                                                                                                                                                                                                                                                                                                                                                                                                                                                                                                                                                                                                                                                                                                                                                                                                                                                                                                                                                                                                                                                                                                                                                                                                                                                                                                                                                                                                                                                                                                                       | R.KLSDFIDPQEGWK.K         |                               | 1,562.86 | 0.0785  | <input checked="" type="checkbox"/> | <input type="checkbox"/>            |
| 0                                                                                                                                                                                                                                                                                                                                                                                                                                                                                                                                                                                                                                                                                                                                                                                                                                                                                                                                                                                                                                                                                                                                                                                                                                                                                                                                                                                                                                                                                                                                                                                                                                                                                                                                                                                                        | R.KLSDFIDPQEGWKK.L        | Phospho (ST)                  | 1,770.89 | 0.0462  | <input type="checkbox"/>            | <input checked="" type="checkbox"/> |
| 0                                                                                                                                                                                                                                                                                                                                                                                                                                                                                                                                                                                                                                                                                                                                                                                                                                                                                                                                                                                                                                                                                                                                                                                                                                                                                                                                                                                                                                                                                                                                                                                                                                                                                                                                                                                                        | K.LSDFIDPQEGWK.K          |                               | 1,434.77 | 0.0769  | <input type="checkbox"/>            | <input checked="" type="checkbox"/> |
| 0                                                                                                                                                                                                                                                                                                                                                                                                                                                                                                                                                                                                                                                                                                                                                                                                                                                                                                                                                                                                                                                                                                                                                                                                                                                                                                                                                                                                                                                                                                                                                                                                                                                                                                                                                                                                        | K.LAVAIKKPSGDDRYNQFHIR.R  |                               | 2,328.40 | 0.1441  | <input type="checkbox"/>            | <input checked="" type="checkbox"/> |
| 0                                                                                                                                                                                                                                                                                                                                                                                                                                                                                                                                                                                                                                                                                                                                                                                                                                                                                                                                                                                                                                                                                                                                                                                                                                                                                                                                                                                                                                                                                                                                                                                                                                                                                                                                                                                                        | K.LAVAIKKPSGDDRYNQFHIRR.F | Phospho (ST)                  | 2,564.29 | -0.0364 | <input type="checkbox"/>            | <input checked="" type="checkbox"/> |
| 89                                                                                                                                                                                                                                                                                                                                                                                                                                                                                                                                                                                                                                                                                                                                                                                                                                                                                                                                                                                                                                                                                                                                                                                                                                                                                                                                                                                                                                                                                                                                                                                                                                                                                                                                                                                                       | K.KPSGDDRYNQFHIR.R        |                               | 1,732.96 | 0.1135  | <input checked="" type="checkbox"/> | <input type="checkbox"/>            |
| 0                                                                                                                                                                                                                                                                                                                                                                                                                                                                                                                                                                                                                                                                                                                                                                                                                                                                                                                                                                                                                                                                                                                                                                                                                                                                                                                                                                                                                                                                                                                                                                                                                                                                                                                                                                                                        | K.KPSGDDR.Y               | Phospho (ST)                  | 854.32   | -0.0173 | <input type="checkbox"/>            | <input checked="" type="checkbox"/> |
| 0                                                                                                                                                                                                                                                                                                                                                                                                                                                                                                                                                                                                                                                                                                                                                                                                                                                                                                                                                                                                                                                                                                                                                                                                                                                                                                                                                                                                                                                                                                                                                                                                                                                                                                                                                                                                        | K.KPSGDDRYNQFHIRR.F       |                               | 1,889.05 | 0.0922  | <input type="checkbox"/>            | <input checked="" type="checkbox"/> |
| 44                                                                                                                                                                                                                                                                                                                                                                                                                                                                                                                                                                                                                                                                                                                                                                                                                                                                                                                                                                                                                                                                                                                                                                                                                                                                                                                                                                                                                                                                                                                                                                                                                                                                                                                                                                                                       | R.YNQFHIR.R               |                               | 977.54   | 0.0472  | <input checked="" type="checkbox"/> | <input type="checkbox"/>            |
| 0                                                                                                                                                                                                                                                                                                                                                                                                                                                                                                                                                                                                                                                                                                                                                                                                                                                                                                                                                                                                                                                                                                                                                                                                                                                                                                                                                                                                                                                                                                                                                                                                                                                                                                                                                                                                        | R.YNQFHIRR.F              |                               | 1,133.64 | 0.0386  | <input type="checkbox"/>            | <input checked="" type="checkbox"/> |
| 52                                                                                                                                                                                                                                                                                                                                                                                                                                                                                                                                                                                                                                                                                                                                                                                                                                                                                                                                                                                                                                                                                                                                                                                                                                                                                                                                                                                                                                                                                                                                                                                                                                                                                                                                                                                                       | R.RFEALLQTGK.S            |                               | 1,162.72 | 0.0650  | <input checked="" type="checkbox"/> | <input type="checkbox"/>            |



**Table 4:** Peptides identified by MALDI-TOF MS after digestion of IRAK-4 DD using Chymotrypsin.

| 9947                                                                                                                                                                                                                                                                                                                                                                                                                                                                                                                                                                                                                                                                                                                                                                                                                                                                                                                                                                                                                                                                                                                                                                                                                                                                                                                                                                                                                                                                                                                                                                                                                                   | IRAK4 DEATH DOMAIN        | 20                            | 80%      | 357     |                                     |                                     |
|----------------------------------------------------------------------------------------------------------------------------------------------------------------------------------------------------------------------------------------------------------------------------------------------------------------------------------------------------------------------------------------------------------------------------------------------------------------------------------------------------------------------------------------------------------------------------------------------------------------------------------------------------------------------------------------------------------------------------------------------------------------------------------------------------------------------------------------------------------------------------------------------------------------------------------------------------------------------------------------------------------------------------------------------------------------------------------------------------------------------------------------------------------------------------------------------------------------------------------------------------------------------------------------------------------------------------------------------------------------------------------------------------------------------------------------------------------------------------------------------------------------------------------------------------------------------------------------------------------------------------------------|---------------------------|-------------------------------|----------|---------|-------------------------------------|-------------------------------------|
| <p><b>G</b> <b>A</b> <b>M</b> <b>D</b> <b>P</b> <b>E</b> <b>F</b> <b>M</b> <b>N</b> <b>K</b> <u><b>P</b></u> <u><b>I</b></u> <u><b>T</b></u> <u><b>P</b></u> <u><b>S</b></u> <u><b>I</b></u> <u><b>Y</b></u> <b>V</b> <b>R</b> <b>C</b> <b>L</b> <u><b>N</b></u> <u><b>V</b></u> <u><b>G</b></u> <u><b>L</b></u> <u><b>I</b></u> <u><b>R</b></u> <u><b>K</b></u> <u><b>L</b></u> <u><b>S</b></u> <u><b>D</b></u> <u><b>E</b></u> <u><b>I</b></u> <u><b>D</b></u> <u><b>P</b></u> <u><b>Q</b></u> <u><b>E</b></u> <u><b>G</b></u> <u><b>W</b></u> <u><b>K</b></u> <u><b>K</b></u> <u><b>L</b></u> <u><b>A</b></u> <u><b>V</b></u> <u><b>A</b></u> <u><b>I</b></u> <u><b>K</b></u> <u><b>K</b></u> <u><b>P</b></u> <u><b>S</b></u><br/> <b>G</b> <b>D</b> <b>D</b> <b>R</b> <b>Y</b> <b>N</b> <b>Q</b> <b>F</b> <b>H</b> <b>I</b> <u><b>R</b></u> <u><b>R</b></u> <u><b>E</b></u> <u><b>E</b></u> <u><b>A</b></u> <u><b>L</b></u> <u><b>L</b></u> <u><b>Q</b></u> <u><b>I</b></u> <u><b>G</b></u> <u><b>K</b></u> <u><b>S</b></u> <u><b>P</b></u> <u><b>I</b></u> <u><b>S</b></u> <u><b>E</b></u> <u><b>L</b></u> <u><b>L</b></u> <u><b>E</b></u> <u><b>D</b></u> <u><b>W</b></u> <u><b>G</b></u> <u><b>T</b></u> <u><b>T</b></u> <u><b>N</b></u> <u><b>C</b></u> <u><b>T</b></u> <u><b>V</b></u> <u><b>G</b></u> <u><b>D</b></u> <u><b>L</b></u> <u><b>V</b></u> <u><b>D</b></u> <u><b>L</b></u> <u><b>L</b></u> <u><b>I</b></u> <u><b>Q</b></u> <u><b>N</b></u> <u><b>E</b></u> <u><b>F</b></u><br/> <b>F</b> <b>A</b> <b>P</b> <b>A</b> <b>S</b> <b>L</b> <b>L</b> <b>L</b> <b>P</b> <b>D</b> <b>A</b> <b>V</b> <b>P</b> <b>K</b></p> |                           |                               |          |         |                                     |                                     |
| <p><b>Red = MS-MS</b> <b>Underline = PMF</b></p>                                                                                                                                                                                                                                                                                                                                                                                                                                                                                                                                                                                                                                                                                                                                                                                                                                                                                                                                                                                                                                                                                                                                                                                                                                                                                                                                                                                                                                                                                                                                                                                       |                           |                               |          |         |                                     |                                     |
| <p>Comments: Individual ions scores &gt; 32 indicate identity or extensive homology (p&lt;0.05).</p>                                                                                                                                                                                                                                                                                                                                                                                                                                                                                                                                                                                                                                                                                                                                                                                                                                                                                                                                                                                                                                                                                                                                                                                                                                                                                                                                                                                                                                                                                                                                   |                           |                               |          |         |                                     |                                     |
| Score                                                                                                                                                                                                                                                                                                                                                                                                                                                                                                                                                                                                                                                                                                                                                                                                                                                                                                                                                                                                                                                                                                                                                                                                                                                                                                                                                                                                                                                                                                                                                                                                                                  | Peptide                   | Modifications                 | Obs. m/z | Delta   | MS-MS?                              | PMF?                                |
| 34                                                                                                                                                                                                                                                                                                                                                                                                                                                                                                                                                                                                                                                                                                                                                                                                                                                                                                                                                                                                                                                                                                                                                                                                                                                                                                                                                                                                                                                                                                                                                                                                                                     | -.GAMDPEFMNKIPSTY.V       | 2 Oxidation (M); Phospho (ST) | 2,010.89 | 0.0626  | <input checked="" type="checkbox"/> | <input type="checkbox"/>            |
| 0                                                                                                                                                                                                                                                                                                                                                                                                                                                                                                                                                                                                                                                                                                                                                                                                                                                                                                                                                                                                                                                                                                                                                                                                                                                                                                                                                                                                                                                                                                                                                                                                                                      | -.GAMDPEF.M               |                               | 766.38   | 0.0711  | <input type="checkbox"/>            | <input checked="" type="checkbox"/> |
| 0                                                                                                                                                                                                                                                                                                                                                                                                                                                                                                                                                                                                                                                                                                                                                                                                                                                                                                                                                                                                                                                                                                                                                                                                                                                                                                                                                                                                                                                                                                                                                                                                                                      | -.GAMDPEFMNKIPSTY.V       |                               | 1,898.92 | 0.0535  | <input type="checkbox"/>            | <input checked="" type="checkbox"/> |
| 0                                                                                                                                                                                                                                                                                                                                                                                                                                                                                                                                                                                                                                                                                                                                                                                                                                                                                                                                                                                                                                                                                                                                                                                                                                                                                                                                                                                                                                                                                                                                                                                                                                      | -.GAMDPEFMNKIPSTY.V       | Oxidation (M)                 | 1,914.91 | 0.0525  | <input type="checkbox"/>            | <input checked="" type="checkbox"/> |
| 0                                                                                                                                                                                                                                                                                                                                                                                                                                                                                                                                                                                                                                                                                                                                                                                                                                                                                                                                                                                                                                                                                                                                                                                                                                                                                                                                                                                                                                                                                                                                                                                                                                      | -.GAMDPEFMNKIPSTY.V       | 2 Oxidation (M)               | 1,930.91 | 0.0573  | <input type="checkbox"/>            | <input checked="" type="checkbox"/> |
| 79                                                                                                                                                                                                                                                                                                                                                                                                                                                                                                                                                                                                                                                                                                                                                                                                                                                                                                                                                                                                                                                                                                                                                                                                                                                                                                                                                                                                                                                                                                                                                                                                                                     | L.NVGLIRKLSDFIDPQEGW.K    |                               | 2,087.17 | 0.0762  | <input checked="" type="checkbox"/> | <input type="checkbox"/>            |
| 0                                                                                                                                                                                                                                                                                                                                                                                                                                                                                                                                                                                                                                                                                                                                                                                                                                                                                                                                                                                                                                                                                                                                                                                                                                                                                                                                                                                                                                                                                                                                                                                                                                      | L.NVGLIRKLS               |                               | 912.62   | 0.0219  | <input type="checkbox"/>            | <input checked="" type="checkbox"/> |
| 69                                                                                                                                                                                                                                                                                                                                                                                                                                                                                                                                                                                                                                                                                                                                                                                                                                                                                                                                                                                                                                                                                                                                                                                                                                                                                                                                                                                                                                                                                                                                                                                                                                     | L.IRKLSDFIDPQEGW.K        |                               | 1,703.92 | 0.0454  | <input checked="" type="checkbox"/> | <input type="checkbox"/>            |
| 0                                                                                                                                                                                                                                                                                                                                                                                                                                                                                                                                                                                                                                                                                                                                                                                                                                                                                                                                                                                                                                                                                                                                                                                                                                                                                                                                                                                                                                                                                                                                                                                                                                      | L.IRKLSDFIDPQEGWKKL.A     |                               | 2,073.20 | 0.0546  | <input type="checkbox"/>            | <input checked="" type="checkbox"/> |
| 0                                                                                                                                                                                                                                                                                                                                                                                                                                                                                                                                                                                                                                                                                                                                                                                                                                                                                                                                                                                                                                                                                                                                                                                                                                                                                                                                                                                                                                                                                                                                                                                                                                      | L.SDFIDPQEGWKKL.A         |                               | 1,562.82 | 0.0359  | <input type="checkbox"/>            | <input checked="" type="checkbox"/> |
| 0                                                                                                                                                                                                                                                                                                                                                                                                                                                                                                                                                                                                                                                                                                                                                                                                                                                                                                                                                                                                                                                                                                                                                                                                                                                                                                                                                                                                                                                                                                                                                                                                                                      | W.KKLAVAIAIKKPSGDDRY.N    |                               | 1,789.07 | 0.0377  | <input type="checkbox"/>            | <input checked="" type="checkbox"/> |
| 0                                                                                                                                                                                                                                                                                                                                                                                                                                                                                                                                                                                                                                                                                                                                                                                                                                                                                                                                                                                                                                                                                                                                                                                                                                                                                                                                                                                                                                                                                                                                                                                                                                      | W.KKLAVAIAIKKPSGDDRYNQF.H |                               | 2,178.27 | 0.0699  | <input type="checkbox"/>            | <input checked="" type="checkbox"/> |
| 78                                                                                                                                                                                                                                                                                                                                                                                                                                                                                                                                                                                                                                                                                                                                                                                                                                                                                                                                                                                                                                                                                                                                                                                                                                                                                                                                                                                                                                                                                                                                                                                                                                     | L.AVAIAIKKPSGDDRYNQF.H    |                               | 1,808.98 | 0.0558  | <input checked="" type="checkbox"/> | <input type="checkbox"/>            |
| 55                                                                                                                                                                                                                                                                                                                                                                                                                                                                                                                                                                                                                                                                                                                                                                                                                                                                                                                                                                                                                                                                                                                                                                                                                                                                                                                                                                                                                                                                                                                                                                                                                                     | L.AVAIAIKKPSGDDRY.N       |                               | 1,419.80 | 0.0398  | <input checked="" type="checkbox"/> | <input type="checkbox"/>            |
| 0                                                                                                                                                                                                                                                                                                                                                                                                                                                                                                                                                                                                                                                                                                                                                                                                                                                                                                                                                                                                                                                                                                                                                                                                                                                                                                                                                                                                                                                                                                                                                                                                                                      | Y.NQFHRRF.E               |                               | 1,117.63 | 0.0318  | <input type="checkbox"/>            | <input checked="" type="checkbox"/> |
| 0                                                                                                                                                                                                                                                                                                                                                                                                                                                                                                                                                                                                                                                                                                                                                                                                                                                                                                                                                                                                                                                                                                                                                                                                                                                                                                                                                                                                                                                                                                                                                                                                                                      | F.HIRRF.E                 |                               | 728.43   | -0.0031 | <input type="checkbox"/>            | <input checked="" type="checkbox"/> |
| 0                                                                                                                                                                                                                                                                                                                                                                                                                                                                                                                                                                                                                                                                                                                                                                                                                                                                                                                                                                                                                                                                                                                                                                                                                                                                                                                                                                                                                                                                                                                                                                                                                                      | F.HIRRFEAL.L              |                               | 1,041.62 | 0.0269  | <input type="checkbox"/>            | <input checked="" type="checkbox"/> |
| 0                                                                                                                                                                                                                                                                                                                                                                                                                                                                                                                                                                                                                                                                                                                                                                                                                                                                                                                                                                                                                                                                                                                                                                                                                                                                                                                                                                                                                                                                                                                                                                                                                                      | F.HIRRFEALL.Q             |                               | 1,154.72 | 0.0354  | <input type="checkbox"/>            | <input checked="" type="checkbox"/> |
| 0                                                                                                                                                                                                                                                                                                                                                                                                                                                                                                                                                                                                                                                                                                                                                                                                                                                                                                                                                                                                                                                                                                                                                                                                                                                                                                                                                                                                                                                                                                                                                                                                                                      | L.QTGKSPTSSELLFDW.G       | Phospho (ST)                  | 1,688.90 | 0.1433  | <input type="checkbox"/>            | <input checked="" type="checkbox"/> |
| 42                                                                                                                                                                                                                                                                                                                                                                                                                                                                                                                                                                                                                                                                                                                                                                                                                                                                                                                                                                                                                                                                                                                                                                                                                                                                                                                                                                                                                                                                                                                                                                                                                                     | F.FAPASLLLPDAVPK.-        |                               | 1,438.87 | 0.0371  | <input checked="" type="checkbox"/> | <input type="checkbox"/>            |

**Table 5:** Peptides identified by LC / MS - MS after digestion of IRAK-4 DD using Asp-N.

| Score | Peptide                    | Modifications | Obs. m/z | Delta   | MS-MS?                              | PMF?                     |
|-------|----------------------------|---------------|----------|---------|-------------------------------------|--------------------------|
| 19    | M.DPEFMNKPITPSTYVRC        | Oxidation (M) | 791.92   | 0.0028  | <input checked="" type="checkbox"/> | <input type="checkbox"/> |
| 25    | S.DFIDPQEGWKKLAVAIKKPSG.D  |               | 776.43   | 0.0013  | <input checked="" type="checkbox"/> | <input type="checkbox"/> |
| 31    | I.DPQEGWKKLAVAIKKPSG.D     |               | 651.37   | 0.0031  | <input checked="" type="checkbox"/> | <input type="checkbox"/> |
| 29    | I.DPQEGWKKLAVAIKKPSG.D     |               | 689.71   | -0.0010 | <input checked="" type="checkbox"/> | <input type="checkbox"/> |
| (28)  | I.DPQEGWKKLAVAIKKPSG.D     |               | 976.56   | 0.0066  | <input checked="" type="checkbox"/> | <input type="checkbox"/> |
| 23    | Q.EGWKKLAVAIKKPSG.D        |               | 403.75   | 0.0006  | <input checked="" type="checkbox"/> | <input type="checkbox"/> |
| 31    | G.DDRYNQFHRRF.E            |               | 417.46   | -0.0004 | <input checked="" type="checkbox"/> | <input type="checkbox"/> |
| (24)  | G.DDRYNQFHRRF.E            |               | 417.46   | 0.0006  | <input checked="" type="checkbox"/> | <input type="checkbox"/> |
| 67    | F.EALLQTGKSPTS.E           |               | 616.33   | -0.0008 | <input checked="" type="checkbox"/> | <input type="checkbox"/> |
| 22    | V.DLLIQNEFFAPASLLLPDAVPK.- |               | 804.45   | 0.0013  | <input checked="" type="checkbox"/> | <input type="checkbox"/> |
| 33    | N.EFFAPASLLLPDAVPK.-       |               | 857.98   | 0.0015  | <input checked="" type="checkbox"/> | <input type="checkbox"/> |

**Table 6:** Peptides identified by MALDI-TOF MS after digestion of IRAK-4 DD using Asp-N.

| Score | Peptide                    | Modifications | Obs. m/z | Delta   | MS-MS?                              | PMF?                                |
|-------|----------------------------|---------------|----------|---------|-------------------------------------|-------------------------------------|
| 0     | M.DPEFMNKPITPSTYVRC        | Oxidation (M) | 3,164.86 | 0.1989  | <input type="checkbox"/>            | <input checked="" type="checkbox"/> |
| 134   | S.DFIDPQEGWKKLAVAIKKPSG.D  |               | 2,327.43 | 0.1534  | <input checked="" type="checkbox"/> | <input type="checkbox"/>            |
| 115   | I.DPQEGWKKLAVAIKKPSG.D     |               | 1,952.22 | 0.1280  | <input checked="" type="checkbox"/> | <input type="checkbox"/>            |
| 0     | G.DDRYNQFHRRF.E            |               | 1,666.92 | 0.1008  | <input type="checkbox"/>            | <input checked="" type="checkbox"/> |
| 0     | D.DRYNQFHRRFEALLQTGKSPTS.E | Phospho (ST)  | 2,844.30 | -0.0975 | <input type="checkbox"/>            | <input checked="" type="checkbox"/> |

**Table 7:** MS/MS Fragmentation of GAMDPEFMNKPITPSTYVR

(a) Peptide fragment spectrum of b- and y- ion series corresponding to the cleavage of the amide bond at the N-terminus and C-terminus respectively. (b) Table of the corresponding observed fragmentation masses showing matching peptide hits in Bold Red: 45/272 fragment ions using 125 most intense peaks used to give an ion score of 20 in the MASCOT database. (c) Zoomed area of peptide fragment spectrum from 1600 to 1750 m/z showing the ion b\*(15) corresponding to the loss of 98 Da at Ser8. (d) Zoomed area of peptide fragment spectrum from 300 to 400 m/z showing the ion y<sup>++</sup>(5) corresponding to the loss of 98 Da at Ser8.

(a)

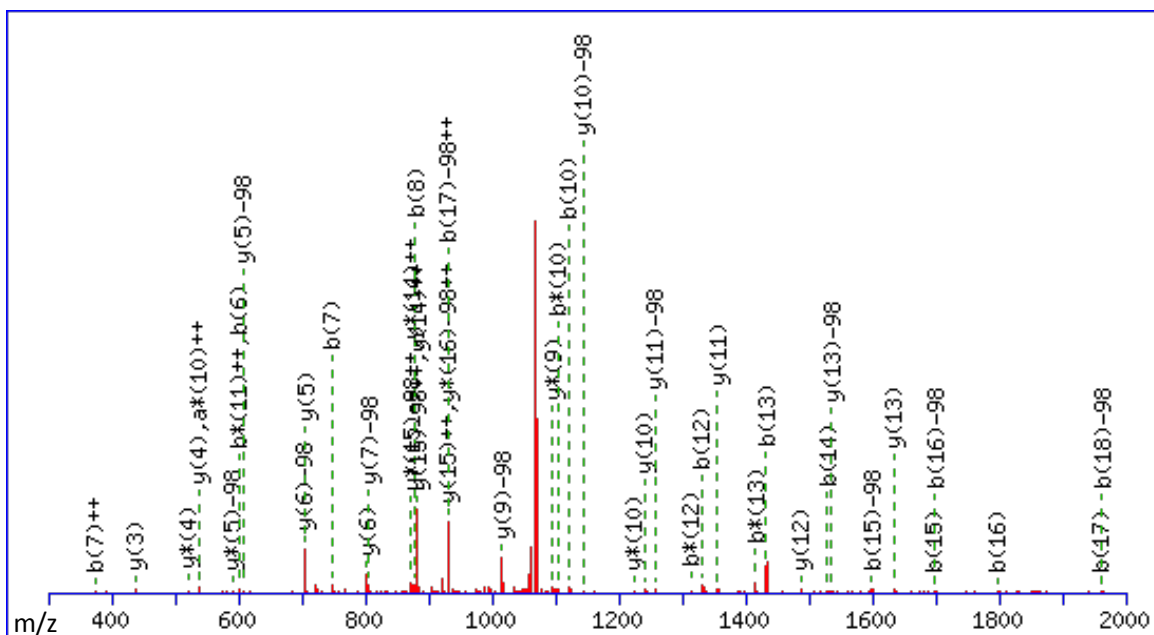

(b)

| #  | b                | b <sup>++</sup> | b*               | b <sup>++</sup> * | Seq.     | y                | y <sup>++</sup>  | y*               | y <sup>++</sup> * | #  |
|----|------------------|-----------------|------------------|-------------------|----------|------------------|------------------|------------------|-------------------|----|
| 1  | 58.0287          | 29.5180         |                  |                   | <b>G</b> |                  |                  |                  |                   | 19 |
| 2  | 129.0659         | 65.0366         |                  |                   | A        | 2176.9807        | 1088.9940        | 2159.9541        | 1080.4807         | 18 |
| 3  | <b>260.1063</b>  | 130.5568        |                  |                   | M        | 2105.9436        | <b>1053.4754</b> | 2088.9170        | 1044.9621         | 17 |
| 4  | <b>375.1333</b>  | 188.0703        |                  |                   | D        | 1974.9031        | <b>987.9552</b>  | <b>1957.8765</b> | 979.4419          | 16 |
| 5  | <b>472.1860</b>  | 236.5967        |                  |                   | P        | <b>1859.8761</b> | <b>930.4417</b>  | 1842.8496        | 921.9284          | 15 |
| 6  | <b>601.2286</b>  | 301.1180        |                  |                   | E        | 1762.8234        | <b>881.9153</b>  | 1745.7968        | 873.4021          | 14 |
| 7  | 748.2971         | <b>374.6522</b> |                  |                   | F        | 1633.7808        | <b>817.3940</b>  | 1616.7542        | 808.8808          | 13 |
| 8  | <b>879.3375</b>  | 440.1724        |                  |                   | M        | 1486.7124        | 743.8598         | 1469.6858        | 735.3465          | 12 |
| 9  | <b>993.3805</b>  | 497.1939        | 976.3539         | 488.6806          | N        | 1355.6719        | <b>678.3396</b>  | 1338.6453        | 669.8263          | 11 |
| 10 | <b>1121.4754</b> | 561.2414        | 1104.4489        | 552.7281          | K        | 1241.6290        | <b>621.3181</b>  | 1224.6024        | <b>612.8048</b>   | 10 |
| 11 | 1218.5282        | 609.7677        | 1201.5016        | <b>601.2545</b>   | P        | <b>1113.5340</b> | <b>557.2706</b>  | 1096.5074        | 548.7574          | 9  |
| 12 | <b>1331.6123</b> | 666.3098        | 1314.5857        | 657.7965          | I        | <b>1016.4812</b> | <b>508.7443</b>  | 999.4547         | 500.2310          | 8  |
| 13 | <b>1432.6599</b> | <b>716.8336</b> | <b>1415.6334</b> | 708.3203          | T        | <b>903.3972</b>  | <b>452.2022</b>  | 886.3706         | 443.6889          | 7  |
| 14 | 1529.7127        | 765.3600        | 1512.6861        | 756.8467          | P        | <b>802.3495</b>  | <b>401.6784</b>  | 785.3229         | 393.1651          | 6  |
| 15 | 1696.7111        | 848.8592        | <b>1679.6845</b> | 840.3459          | S        | 705.2967         | <b>353.1520</b>  | 688.2702         | 344.6387          | 5  |
| 16 | <b>1797.7587</b> | 899.3830        | 1780.7322        | 890.8697          | T        | <b>538.2984</b>  | 269.6528         | 521.2718         | 261.1396          | 4  |
| 17 | 1960.8221        | 980.9147        | 1943.7955        | 972.4014          | Y        | <b>437.2507</b>  | <b>219.1290</b>  | 420.2241         | 210.6157          | 3  |
| 18 | 2059.8905        | 1030.4489       | 2042.8639        | 1021.9356         | V        | <b>274.1874</b>  | 137.5973         | 257.1608         | 129.0840          | 2  |
| 19 |                  |                 |                  |                   | R        | 175.1190         | 88.0631          | 158.0924         | 79.5498           | 1  |

(c)

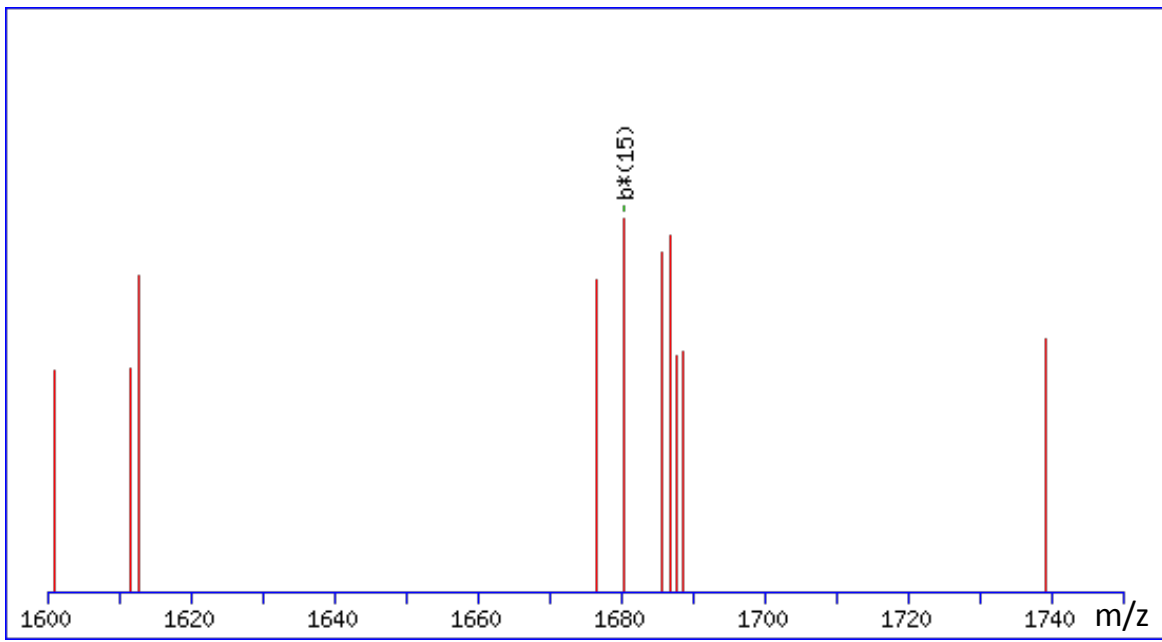

(d)

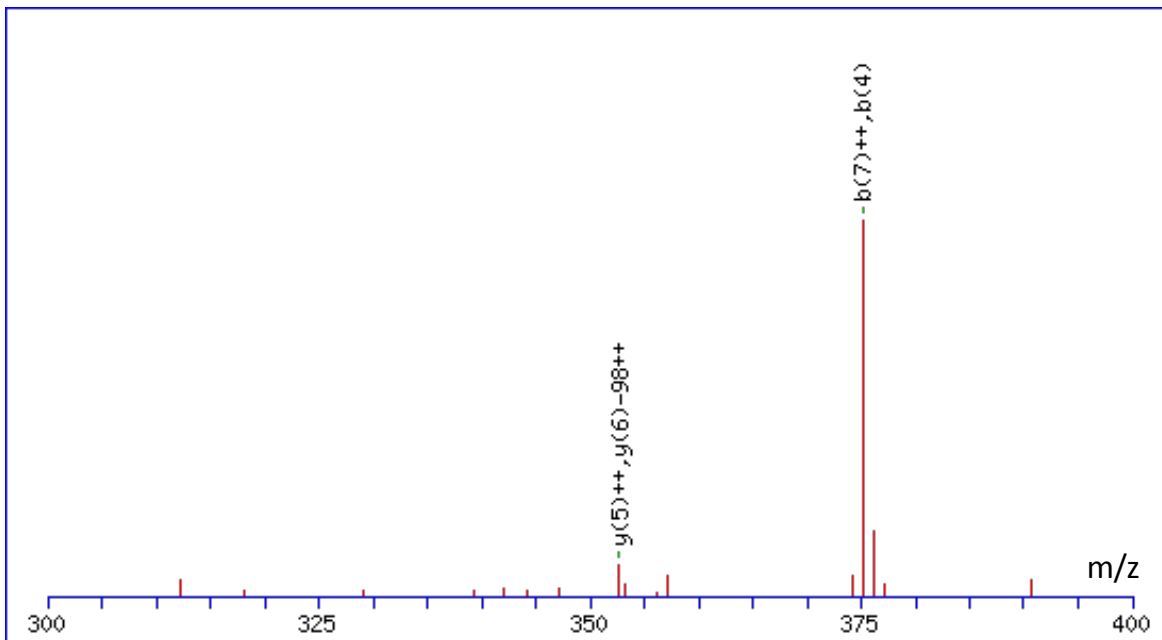

**Table 8:** MS/MS Fragmentation of GAMDPEFMNKPITPSTYVR

(a) Peptide fragment spectrum of b- and y- ion series corresponding to the cleavage of the amide bond at the N-terminus and C-terminus respectively. (b) Table of the corresponding observed fragmentation masses showing matching peptide hits in 56/272 fragment ions using 129 most intense peaks used to give an ion score of 48 in the MASCOT database. (c) Zoomed area of peptide fragment spectrum from 1550 to 1650 m/z showing the ion b(15) corresponding to the loss of 98 Da at Ser8. (d) Zoomed area of peptide fragment spectrum from 550 to 650 m/z showing the ions y(5) and y\*(5) corresponding to the loss of 98 Da at Ser8.

(a)

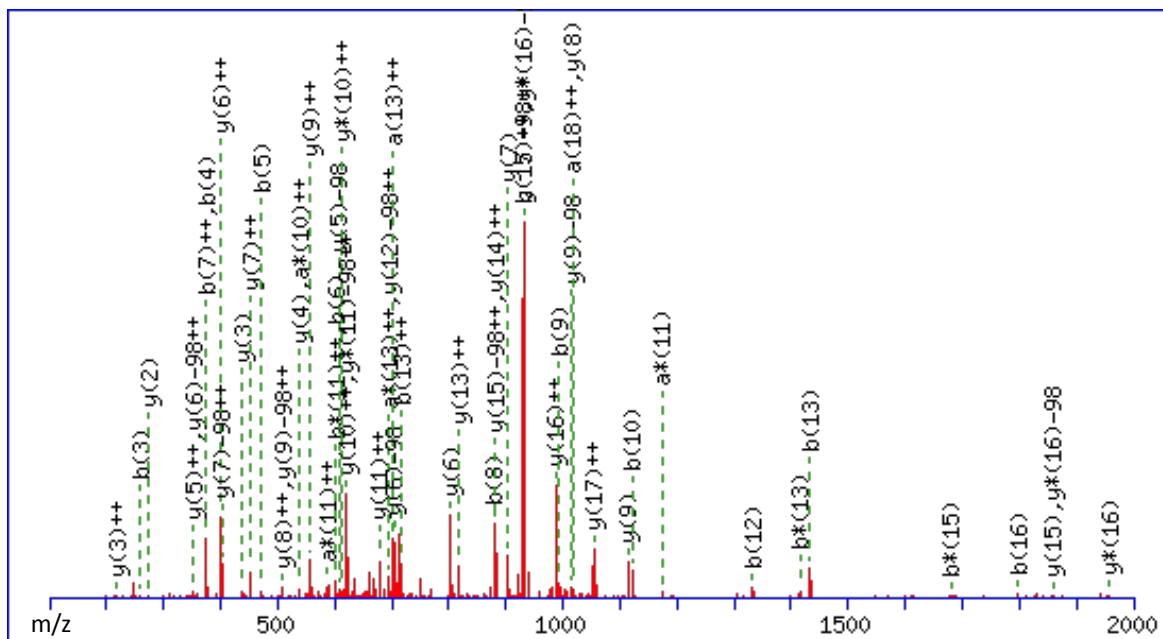

(b)

| #  | b         | b <sup>++</sup> | b <sup>*</sup> | b <sup>+++</sup> | Seq. | y         | y <sup>++</sup> | y <sup>*</sup> | y <sup>+++</sup> | #  |
|----|-----------|-----------------|----------------|------------------|------|-----------|-----------------|----------------|------------------|----|
| 1  | 58.0287   | 29.5180         |                |                  | G    |           |                 |                |                  | 19 |
| 2  | 129.0659  | 65.0366         |                |                  | A    | 2079.0038 | 1040.0055       | 2061.9772      | 1031.4923        | 18 |
| 3  | 260.1063  | 130.5568        |                |                  | M    | 2007.9667 | 1004.4870       | 1990.9401      | 995.9737         | 17 |
| 4  | 375.1333  | 188.0703        |                |                  | D    | 1876.9262 | 938.9667        | 1859.8996      | 930.4535         | 16 |
| 5  | 472.1860  | 236.5967        |                |                  | P    | 1761.8992 | 881.4533        | 1744.8727      | 872.9400         | 15 |
| 6  | 601.2286  | 301.1180        |                |                  | E    | 1664.8465 | 832.9269        | 1647.8199      | 824.4136         | 14 |
| 7  | 748.2971  | 374.6522        |                |                  | F    | 1535.8039 | 768.4056        | 1518.7773      | 759.8923         | 13 |
| 8  | 879.3375  | 440.1724        |                |                  | M    | 1388.7355 | 694.8714        | 1371.7089      | 686.3581         | 12 |
| 9  | 993.3805  | 497.1939        | 976.3539       | 488.6806         | N    | 1257.6950 | 629.3511        | 1240.6684      | 620.8379         | 11 |
| 10 | 1121.4754 | 561.2414        | 1104.4489      | 552.7281         | K    | 1143.6521 | 572.3297        | 1126.6255      | 563.8164         | 10 |
| 11 | 1218.5282 | 609.7677        | 1201.5016      | 601.2545         | P    | 1015.5571 | 508.2822        | 998.5306       | 499.7689         | 9  |
| 12 | 1331.6123 | 666.3098        | 1314.5857      | 657.7965         | I    | 918.5043  | 459.7558        | 901.4778       | 451.2425         | 8  |
| 13 | 1432.6599 | 716.8336        | 1415.6334      | 708.3203         | T    | 805.4203  | 403.2138        | 788.3937       | 394.7005         | 7  |
| 14 | 1529.7127 | 765.3600        | 1512.6861      | 756.8467         | P    | 704.3726  | 352.6899        | 687.3460       | 344.1767         | 6  |
| 15 | 1598.7342 | 799.8707        | 1581.7076      | 791.3574         | S    | 607.3198  | 304.1636        | 590.2933       | 295.6503         | 5  |
| 16 | 1699.7818 | 850.3946        | 1682.7553      | 841.8813         | T    | 538.2984  | 269.6528        | 521.2718       | 261.1396         | 4  |
| 17 | 1862.8452 | 931.9262        | 1845.8186      | 923.4129         | Y    | 437.2507  | 219.1290        | 420.2241       | 210.6157         | 3  |
| 18 | 1961.9136 | 981.4604        | 1944.8870      | 972.9472         | V    | 274.1874  | 137.5973        | 257.1608       | 129.0840         | 2  |
| 19 |           |                 |                |                  | R    | 175.1190  | 88.0631         | 158.0924       | 79.5498          | 1  |

(c)

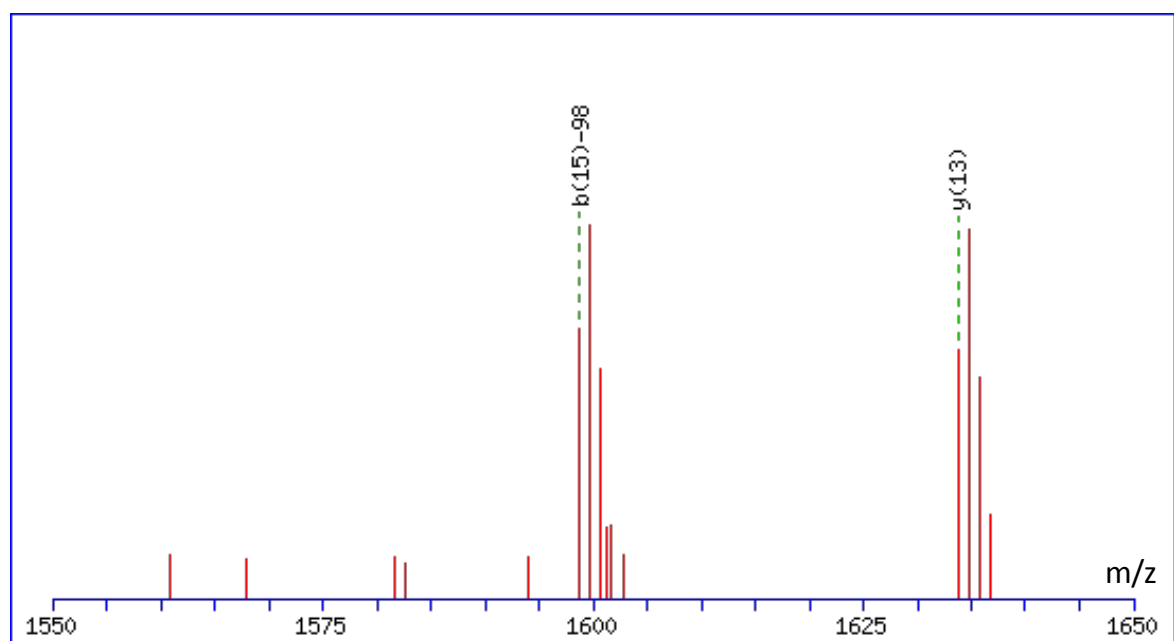

(d)

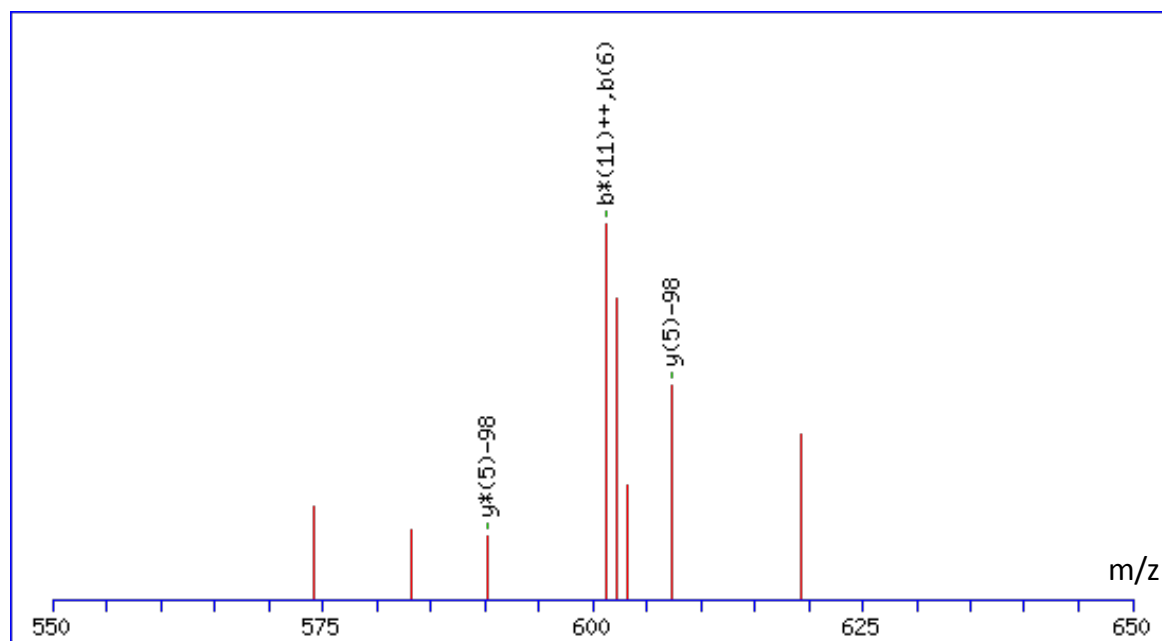

### Supplementary information - Model validation.

After regularization in COOT, sidechain packing was optimised and total energy compared with the unphosphorylated IRAK4 structure (pdb id: 3mop, chain G) using the FoldX atomic forcefield. (FoldX version 4.0 running under Win10)<sup>1</sup>. Sidechain clashes were checked with 'findclash' function in UCSF-Chimera<sup>2</sup>.

Neglecting the new stabilizing interactions of the phospho-serine residue, the helical refolding of the N-terminal 16 residues was calculated by FoldX to be comparable in energy to the crystal structure. Compared with the equivalent optimised crystal structure (minimised with the FoldX 'Repair' protocol), the refolded IRAK4 had an overall  $\Delta\Delta G$  stabilisation of -0.2 kcal/mol (neglecting any phospho-serine contributions). This favourable change in estimated stability on helical refolding is for the IRAK4 in isolation, but no unfavourable contacts are generated when packed with other IRAK4 and IRAK2 chains to form the myddosome assembly.

The geometry and sidechain packing of the refolded IRAK4 were validated with WHATCHECK10.1 (<http://swift.cmbi.ru.nl/gv/whatcheck/>). Ramachandran analysis (with COOT) showed no new outliers were generated by the helix refolding: the IRAK4 crystal structure had 98 residues in preferred or allowed regions, and 7 outliers. None of the outliers is in the N-terminal region and refolding of the N-terminal region does not introduce any new Ramachandran outliers.

### References

1. Kiel, C., Serrano, L. & Herrmann, C. A detailed thermodynamic analysis of ras/effector complex interfaces. *J. Mol. Biol.* **340**, 1039-1058 (2004).
2. Yang, Z. *et al.* UCSF Chimera, MODELLER, and IMP: an integrated modeling system. *J. Struct. Biol.* **179**, 269-278 (2012).
